1 Full title: Future sea-level rise drives rocky intertidal habitat loss and benthic community change

2

3 Short title: Sea-level rise impacts to the rocky intertidal

4

5 Nikolas J. Kaplanis<sup>1,2\*</sup>, Clinton B. Edwards<sup>1</sup>, Yoan Eynaud<sup>1</sup>, Jennifer E. Smith<sup>1</sup>

6

7 1. Scripps Institution of Oceanography, University of California, San Diego,

8 La Jolla, California, United States of America

9 2. Current address: Department of Ecology and Evolutionary Biology, University of California,

10 Santa Cruz, Santa Cruz, California, United States of America

11

12 \*Corresponding author

13 E-mail: [nkaplanis@ucsc.edu](mailto:nkaplanis@ucsc.edu) (NJK)

## 14**Abstract**

15Rocky intertidal ecosystems may be particularly susceptible to sea-level rise impacts but few  
16studies have explored community scale response to future sea-level scenarios. Combining  
17remote-sensing with large-area imaging, we quantify habitat extent and describe biological  
18community structure at two rocky intertidal study locations in California. We then estimate  
19changes in habitat area and community composition under a range of sea-level rise scenarios  
20using a model-based approach. Our results suggest that future sea-level rise will significantly  
21reduce rocky intertidal area at our study locations, leading to an overall decrease in benthic  
22habitat and a reduction in overall invertebrate abundances, but increased densities of certain taxa.  
23These results suggest that sea-level rise may fundamentally alter the structure and function of  
24rocky intertidal systems. As large scale environmental changes such as sea-level rise accelerate  
25in the next century, more extensive spatially-explicit monitoring at ecologically relevant scales  
26will be needed to visualize and quantify the impacts to biological systems.

27

## 28**Introduction**

### 29**Sea-level rise projections and potential impacts to the rocky** 30**intertidal**

31Sea-level rise is predicted to alter habitat availability and modify community structure in many  
32marine ecosystems [1,2]. In the monitoring record, sea-level changes vary among locations but  
33generally show a rising trend, with rates showing a recent increase [1,3–9]. While projections  
34remain uncertain, recent studies predict extremes of up to 2.5 meters of sea-level rise within the

35next century [3,10]. Such large magnitude and rapid sea-level rise poses a substantial risk to the  
36integrity of coastal ecosystems, yet the extent to which it will modify the physical and ecological  
37structure of rocky coastlines remains mostly unknown [11–14].

38Rocky intertidal systems may be particularly vulnerable to sea-level rise driven habitat loss [11–  
3914]. When backed by steep cliffs or anthropogenic structures, as is the case on the majority of  
40coastlines globally [15], rather than migrating shoreward with sea-level rise, many rocky shores  
41are expected to experience “coastal squeeze” -- a general narrowing of the extent of the  
42intertidal zone [16,17] and a steepening of the coastal profile [18]. Recent studies provide a  
43disconcerting consensus that sea-level rise may cause substantial habitat loss. Estimates of  
44habitat loss range from 10-27% with 0.30 m of sea-level rise in Scotland [19], to 10% and 57%  
45with 1.0 and 2.0 m of sea-level rise, respectively, in Oregon, USA [20]. Thorner et al. (2014)  
46found that with 0.3-1.0 m of sea-level rise on five rocky headlands in Australia, impacts will be  
47variable but will largely result in substantial habitat loss [21]. Habitat loss is one of the greatest  
48threats to global biodiversity [22,23]. Thus it is critical to evaluate the current state of rocky  
49intertidal ecosystems and assess how sea-level rise may affect these important communities in  
50coming years.

51The ecological characteristics that make rocky intertidal systems unique may also make them  
52particularly vulnerable to changes in structure and function as a result of sea-level rise. The  
53rocky intertidal is characterized by patterns of ecological zonation that manifest as distinct bands  
54along the tidal elevation gradient. These bands are generated by a variety of spatially and  
55density-dependent biological mechanisms such as competition [24,25], mutualism [26] and  
56predation [25,27–29], all of which are largely influenced by the physical environment [28,30].  
57Sea-level rise will cause an upward shift in this banding as the current intertidal is submerged

58and up-slope habitats become inundated by the sea. While some species may keep pace with this  
59upward shift, many intertidal species are sessile and will likely be incapable of rapidly adjusting  
60their distributions [14]. Additionally it is unclear whether the changing intertidal zone will be  
61suitable for colonization by many species, as habitat characteristics and physical environmental  
62conditions may also change [12]. Thus, coastal squeeze and the rapid upward shift in intertidal  
63area will likely significantly impact the abundance, distribution, and competitive interactions of  
64rocky intertidal species.

65

## 66**Large-area imaging approach to quantify climate change impacts**

67The rocky intertidal is one of the most extensively studied ecosystems, and over 75 years of  
68experimentation and monitoring in these habitats has generated an impressive body of  
69fundamental ecological theory and insight into the mechanisms controlling ecosystem structure  
70[24,25,27–29,31–35]. Traditional sampling methods, however, have been largely restricted in  
71their spatial extent, with units of replication on the scale of one to ten square meters. This limits  
72our ability to address ecological processes which operate on larger spatial scales. Determining  
73how climate change will modify landscape scale patterns in biological communities will require  
74an approach that can integrate high-resolution data at ecologically relevant spatial scales. This  
75has been a major technological challenge in the past.

76Over the past few years several efforts have advanced the use of innovative geographic  
77information system (GIS) sampling tools and analysis software to provide intensive high-  
78resolution, landscape-scale ecological information in the rocky intertidal [36–39]. Unfortunately,  
79these tools have remained somewhat limited in either spatial coverage or taxonomic resolution

80due to technological limitations. While remote sensing techniques such as satellite imagery, light  
81detection and ranging (LiDAR), and aerial photography can provide ecological information on  
82broader landscape-scales, they have been generally limited in taxonomic resolution, and  
83researchers have had to rely on traditional field-based methods to provide species identifications.  
84Recent advances in remote sensing, digital imaging, and modern computing now provide  
85researchers new opportunities to explore the interplay between spatial patterns and ecological  
86processes in the rocky intertidal at spatial scales never before possible (from the millimeter to the  
87kilometer scale) [40–42].

88Here, we investigated the potential ecological impacts of future sea-level rise on rocky intertidal  
89ecosystems, utilizing a multi-scale approach at two marine reserves in San Diego, CA, USA as a  
90case study. Using a LiDAR dataset, we estimated site-level habitat area changes under a range of  
91sea-level rise scenarios. Using newly available high-resolution large-area imaging tools, we then  
92mapped 720 m<sup>2</sup> of intertidal habitat and quantified the percent cover, abundance, and density of  
93sessile and mobile organisms at each site. We then used a modelling approach to investigate  
94future sea-level rise driven changes in the cover, abundance, and density of rocky intertidal  
95species. This work takes a critical step toward determining the future impact of sea-level rise on  
96rocky intertidal communities at ecologically relevant scales and provides a novel framework for  
97future monitoring and experimental efforts.

98

99

100

## 101 **Methods**

### 102 **Survey locations and sites**

103 Two rocky intertidal study locations in San Diego County were chosen: the Scripps Coastal  
104 Reserve (SCR) and the Cabrillo National Monument (CNM) (Fig 1). These locations are  
105 recognized for their ecological and economic importance within the southern California region  
106 and are both designated as marine protected areas (MPAs) under California state legislation.  
107 CNM sites were studied under a permit granted by the US Department of the Interior National  
108 Park Service, Cabrillo (permit #: CABR-2016-SCI-0007), and SCR was studied under a permit  
109 granted by the Scripps Coastal Reserve manager (application #: 33783). Long-term ecological  
110 monitoring has occurred at one distinct site at SCR (SCR 0) since 1997, and at three sites at  
111 CNM (CNM 1-3) since 1990 [43]. All four sites face predominantly west and have a coastal  
112 profile and rocky intertidal structure representative of many rocky intertidal coastlines globally  
113 [15]. The topography of SCR comprises primarily a large, gently sloping boulder-field backed by  
114 steep cliffs, with a large metamorphic dike running south by southwest through the site and  
115 providing a distinct upper limit to the intertidal. CNM is composed of a wide, gently-sloping  
116 rocky intertidal bench with variable areas of flat sandstone terraces, boulders, scree, and sand  
117 accumulation, also backed by steep cliffs [44].

118

119 **Figure 1. Study site overview.** Location of large-area imaging plots (orange rectangles) in San  
120 Diego, CA, USA. Sites were selected to fall within long-term monitoring areas (upcoast and  
121 downcoast boundaries, black lines), and were bounded by highest astronomical tide (HAT, light  
122 red contour) and Mean Lower Low Water (MLLW, dark red contour).

## 123 **Sea-level rise scenarios**

124 In its Fifth Assessment Report, the United Nations Intergovernmental Panel on Climate Change  
125 (IPCC) projects a rise in global sea-level of between 0.26 m and 0.98 m by 2100 [3]. More  
126 recently the National Oceanic and Atmospheric Administration (NOAA) released projections  
127 that include sea-level rise extremes of up to 2.5 m on US coastlines [10]. Sea-level rise  
128 projections for California specifically generally fall within the range of global projections. Cayan  
129 et al. 2008 forecast sea-level rise on the coast of California of 0.11 - 0.72 m by the 2070–2099  
130 period [45]. More recently, the National Research Council (NRC) projected 0.42 - 1.67 m of sea-  
131 level rise relative to 2000 levels by 2100 for the coast of California south of Cape Mendocino  
132 [5]. For this study, sea-level rise scenarios from 0 – 2.0 m were analyzed in 10.0 cm increments  
133 (twenty scenarios) in order to cover the generally accepted potential sea-level rise range for the  
134 California region in the next century. By analyzing sea-level rise in increments, we also avoided  
135 utilizing projections for specific dates, and thus our analysis is not time specific and is more  
136 flexible to the uncertainty of the projections.

137

## 138 **Intertidal area estimation**

139 To estimate rocky intertidal habitat area at survey sites, an open-source LiDAR dataset (the  
140 2009-2011 California Coastal Conservancy Coastal LiDAR Project: Hydro Flattened Bare Earth  
141 Digital Elevation Model (DEM)) was used. This dataset was downloaded from the NOAA Office  
142 of Coastal Management Data Access Viewer [46]. These data were collected by the California  
143 Coastal Conservancy in conjunction with the State of California specifically for shoreline  
144 delineation purposes and to inform coastal planning. This dataset has consistent coverage of our  
145 target area and a tested data quality of 50.0 cm RMSE horizontal accuracy and 4.8 cm RMSE

146vertical accuracy [46]. Data was collected with a Leica ALS60 MPiA sensor with 1.0 m nominal  
147post spacing. WGS1984 and Mean Lower Low Water (MLLW) were selected as horizontal and  
148vertical datums during the data download step to allow later embedding of orthophotos and direct  
149referencing to common tidal datums. DEM data was extracted and visualized in ArcMap 10.5  
150(ESRI 2016. ArcGIS Desktop: Release 10.5 Redlands, CA, USA). Intertidal area was estimated  
151using the DEM Surface Tools Extension for ArcGIS, which provides accurate surface area  
152estimates on a grid by grid basis for raster DEMs using a 3 x 3 cell neighborhood [47].  
153The area of the intertidal zone was estimated from the DEM constrained within specific  
154boundaries at each survey site. The northern and southern most long-term monitoring plots at  
155each site were selected as fixed upcoast and downcoast boundaries. Tidal datums from NOAA  
156tide stations nearest our survey sites (La Jolla, Station ID: 9410230, and San Diego, Station ID:  
1579410170 (S1 Table) were selected as vertical constraints that were allowed to migrate upward  
158under each sea-level rise scenario. Mean Lower Low Water (MLLW) and Highest Astronomical  
159Tide (HAT) were chosen as the lower and upper boundaries. Tidal datum elevations are  
160computed from time series of observed tides at NOAA tidal stations. The current National Tidal  
161Datum Epoch (NTDE) is the 1983-2001 period. The DEM was further segmented to specific  
162tidal elevations to allow analyses by intertidal zone (lower, middle, and upper intertidal). MLLW  
163(0 m) was chosen as the lower limit because it is a commonly used datum and because the  
164penetration limitations of LiDAR did not allow for accurate data below the MLLW line. The  
165middle intertidal was designated as the area between mean low water (MLW) and mean high  
166water (MHW). The upper intertidal was designated as the area between MHW and HAT,  
167encompassing the zone that is only covered during the highest high tides, and the spray zone.  
168Long-term monitoring plot locations confirmed the relevancy of our chosen zone designations,



169as the elevation of plots targeting characteristic lower, middle, and upper intertidal species  
170corresponded closely with our chosen datums (S1 Table). In each scenario, the total area in the  
171intertidal was estimated by adjusting the vertical constraints to the future intertidal extent and  
172summing surface area of all DEM grid cells within the chosen intertidal boundaries.

173

## 174**Benthic community characterization through fine-scale, large-area** 175**imaging**

176In order to gather fine scale information on biological community composition, one plot was  
177established at each site for image collection and subsequent model creation. Plot locations were  
178selected to encompass all representative vertical zonation within the rocky intertidal. To choose  
179plot locations, ten stratified random coordinates were first generated in ArcMap within the upper  
180intertidal area of the LiDAR DEM covering each survey site. Coordinates were then ground-  
181truthed to ensure they occurred on natural substrate within representative upper-intertidal habitat  
182(evaluated on the presence of representative upper-intertidal benthic species). Of those  
183coordinates falling in appropriate habitat, one was then randomly selected as the upper up-coast  
184corner for each plot. Rectangular 6.0 m x 30.0 m plots were then established running  
185perpendicular to the shoreline along the elevation gradient. This size was determined to be  
186sufficient for accomplishing project goals while balancing image collection and data processing  
187capabilities.

188Imagery was collected at the four survey plots between December 2016 and January 2017.

189Survey dates corresponded with the season's lowest tides and with associated long-term

190monitoring surveys. Transect tapes were deployed along predetermined headings to bound the

191survey plot. A GoPro Hero 5 camera (GoPro Inc., San Mateo, CA) was mounted to a frame on a

192handheld transect line and passed between two surveyors across the plot every 0.5 m. Images  
193were collected every 0.5 seconds using a linear field of view setting with an equivalent focal  
194length of 24-49 mm. The camera was held approximately 1.0 m above the substrate to maximize  
195overlap of images while also ensuring sufficient image resolution for accurate species  
196identifications. Ten scale bars of known length (0.5 m) were deployed throughout the plot as x,  
197y, z spatial references, and ground control point (GCP) coordinates were collected at the upcoast  
198end of each scale bar. Images were collected over a 9.0 m x 33.0 m area to ensure that the target  
199plot was imaged with sufficient coverage (1.5 m buffer around perimeter) to minimize areas  
200missing data.

201

## 202**Image processing**

203Agisoft PhotoScan Professional V.1.3 Structure-from-motion (SFM) software (Agisoft LLC  
2042014, St. Petersburg, Russia) was used to create 3-dimensional (3D) models, DEMs, and 2-  
205dimensional orthorectified large-area images (e.g. orthophotos) of the intertidal (Fig 2). The  
206details of 3D model and orthophoto creation have been described in detail elsewhere [40–42,48].  
207Briefly, Agisoft was used to first align imagery and produce a sparse cloud of points extracted  
208from the collected imagery. These sparse clouds were then optimized to correct model geometry  
209and minimize alignment error, and assigned a coordinate system and scale using GCP  
210coordinates and lengths from the scale bars within each plot. Textured dense point clouds were  
211then produced and subsequently meshed to produce fine-scale DEMs of each plot with a 1.0 cm  
212nominal post spacing, providing elevation data for benthic identifications. Finally, top down 2D  
213orthophotos (1.0 mm / pixel resolution) were then produced to allow visual identification and  
214quantification of benthic organisms (Fig 2). This resolution allowed clear identification of all

215organisms of sizes greater than or equal to approximately 1.0 cm in diameter. Orthophotos and  
216DEMs were exported from Agisoft Photoscan in a raster format and uploaded into ArcMap 10.5.  
217These rasters were then clipped to the targeted extent of each plot, and DEM surface area  
218calculations and benthic identifications were conducted.

219

220**Figure 2. Survey plot photomosaic and Digital Elevation Model (DEM).** Example of 6 m x  
22130 m (180 m<sup>2</sup>) benthic landscape mosaic (left) with zoomed in inset, and DEM (right) for study  
222site Cabrillo National Monument Zone 3.

223

## 224**Biological data extraction**

225To determine benthic community composition (% cover) across tidal elevations, stratified  
226random point sampling was conducted within each orthophoto using ArcMap. First, a grid of  
227ninety-six hundred equal sized rectangles (12.5 cm x 15.0 cm) was generated within each plot  
228Ninety-six hundred stratified random points (one within each grid cell) were then generated and  
229these points were manually identified to the highest taxonomic resolution possible (see S2 Table  
230for species identification metadata). Tidal elevation data for each point identification was  
231extracted from the high resolution plot DEMs. This approach allowed quantification of benthic  
232community composition (% cover) across a continuous range of tidal elevation. Benthic  
233community composition was calculated for each species within 10.0 cm elevation bins across  
234each plot using the stratified random point sampling data. Percent cover was calculated by: %

235cover =  $\frac{x_i}{z_i}$ , where i = bin number,  $x_i$  = species stratified random point count in the i<sup>th</sup> bin, and  $z_i$

236= total stratified random point count for all species within the i<sup>th</sup> bin.

237To provide estimates of densities of targeted long-term monitoring invertebrate species at each  
238site, counts of all invertebrates larger than approximately 1.0 cm in diameter were conducted.  
239This included both motile species (owl limpets (*Lottia gigantea* (Sowerby, 1834)), other limpets  
240(*Lottia spp.*), black turban snails (*Tegula funebris* (A. Adams, 1855)), chitons (*Katharina spp.*),  
241dog whelks (*Nucella spp.*), periwinkles (*Littorina spp.*)) and sessile species (solitary anemones  
242(*Anthopleura sola* (Pearse and Francis, 2000) / *Anthopleura elegantissima* (Brandt, 1835)), pink  
243barnacles (*Tetraclita rubescens* (Darwin, 1854)), gooseneck barnacles (*Pollicipes polymerus*  
244(Sowerby, 1883)), and mussels (*Mytilus californianus* (Conrad, 1837))). Species counts were  
245done at a consistent scale (1:4) to allow accurate identification near the limit of orthophoto  
246resolution. Only invertebrates that could be clearly identified at this scale were counted. density  
247of invertebrates was estimated within the same elevation bins mentioned above across the plots.

248Density was calculated by:  $\text{density} = \frac{x_i}{w_i}$ , where  $i$  = bin number,  $x_i$  = species point count within  
249the  $i^{\text{th}}$  bin, and  $w_i$  = total orthophoto plot surface area within the  $i^{\text{th}}$  bin.

250

## 251**Sea-level rise impacts to community composition, abundances, and** 252**densities**

253In order to assess how changes in habitat area as a result of sea-level rise may influence the  
254rocky intertidal community, the cover of benthic organisms (area,  $\text{m}^2$ ), abundance, and density of  
255invertebrates was estimated for each site under each sea-level rise scenario.

256

257

258

## 259 **Species benthic area cover**

260 To estimate how sea-level rise will change benthic community composition, the total area (m<sup>2</sup>)

261 covered by each species in each scenario at each site was calculated as:  $\text{cover} = \sum_{i=1}^n \frac{x_i}{z_i} y_i$ , where  $i$

262 = bin number,  $x_i$  = species stratified random point count within the  $i^{\text{th}}$  bin,  $z_i$  = total point count

263 for all species within the  $i^{\text{th}}$  bin, and  $y_i$  = site surface area within the  $i^{\text{th}}$  bin.

264

## 265 **Scenario abundance estimates**

266 To estimate how sea-level rise will alter invertebrate populations, the abundance (# individuals)

267 for each species in each scenario at each site was calculated as:  $\text{abundance} = \sum_{i=1}^n \frac{x_i}{w_i} y_i$ , where  $i$  =

268 bin number,  $x_i$  = species point count within the  $i^{\text{th}}$  elevation bin,  $w_i$  = sampled orthophoto plot

269 surface area within the  $i^{\text{th}}$  elevation bin, and  $y_i$  = landscape surface area within the  $i^{\text{th}}$  bin.

270

## 271 **Scenario density estimates**

272 In order to estimate overall density for each species in each scenario at each site the above

273 abundance estimate values were divided by the total intertidal area within each site in each

274 scenario. Density (# / m<sup>2</sup>) was calculated as:  $\text{density} = \frac{\sum_{i=1}^n \frac{x_i}{w_i} y_i}{y_{sl}}$ , where  $s$  = scenario number,  $l$  =

275 site,  $i$  = bin number,  $x_i$  = species point count within the  $i^{\text{th}}$  elevation bin,  $w_i$  = sampled orthophoto

276 plot surface area within the  $i^{\text{th}}$  elevation bin,  $y_i$  = landscape surface area within the  $i^{\text{th}}$  bin, and  $y_{sl}$

277 = landscape surface area across the entire intertidal for scenario  $s$  at site  $l$ .

278

## 279 **Results**

### 280 **Change in intertidal habitat area and zonation with sea-level rise**

281 Using a LiDAR elevation dataset, we estimated habitat area within current and future intertidal  
282 elevation ranges at each of our study sites under scenarios of 0 - 2.0 m of sea-level rise and found  
283 that sea-level rise will significantly reduce total intertidal habitat area (m<sup>2</sup>) (Fig 3). Following a  
284 sea-level rise trajectory consistent with the observed trend in San Diego, CA, (approximately  
285 20.0 cm by 2100), total intertidal habitat area loss will be on average 29.88 % ( $\pm$  3.78, SE) across  
286 study sites. Under the IPCC upper-end global projection of 1.0 m by 2100 [3], this value will  
287 reach 77.72% ( $\pm$  4.65). Under the NRC upper-end projection for California [5] of 1.7 m, this  
288 value will rise to 85.32% ( $\pm$  2.33). Habitat loss will be greatest for the lower and middle  
289 intertidal zones, which currently occupy a broad intertidal shelf that will rapidly become subtidal  
290 as sea-levels rise (Fig 3). Under scenarios greater than 0.2 m the lower intertidal will nearly  
291 always experience the greatest proportional habitat area loss, followed by the middle, then upper  
292 zones (Fig 3). As a result, we expect that the proportional contribution of each zone to total  
293 intertidal area will shift, with the contribution of the lower intertidal diminishing, and that of the  
294 middle and upper zones increasing (Fig 3, S1 Fig).

295

296 **Figure 3. Intertidal area changes with sea-level rise.** a. site and zone level intertidal habitat  
297 area under 0 – 2.0 m of sea-level rise at four survey sites. b. site and zone level intertidal area  
298 change (% change) under three sea-level rise scenarios. Both panels show significant habitat area  
299 loss at study sites.

300

### 301 **Impacts to benthic community composition with sea-level rise**

302 With little exception, we found that sea-level rise will result in lower overall habitat area and  
303 thus benthic area cover (m<sup>2</sup>) of rocky intertidal organisms. Importantly, species will experience  
304 benthic cover changes of different magnitudes, resulting in changes in community structure as  
305 the relative abundance of different species shifts (Fig 4). The most pronounced changes will  
306 occur in the first half meter of sea-level rise for all species. At 0.5 m of sea-level rise, we  
307 estimate a mean decrease in total benthic cover across all species and study sites of 56.95% ( $\pm$   
308 2.40). Benthic cover changes will be most pronounced for those taxa that primarily occupy lower  
309 and middle intertidal habitats, such as articulated coralline algae, brown algae, red foliose algae,  
310 and turf algae species, and surfgrass (see S2 Table for species identifications and classifications).  
311 For example, we estimate that cover of articulated coralline algae will decrease by an average of  
312 83.74% ( $\pm$  4.72 SE; range 70.10 - 91.77) across our study sites under the IPCC upper-end  
313 projection. Under the more extreme NRC projection, we expect decreases of cover of up to  
314 98.22%, 97.42% and 97.20% for chainbladder kelp (*Stephanocystis setchellii* ((N.L.Gardner)  
315 Draisma, Ballesteros, F.Rousseau & T.Thibaut, 2010: 1340)), wireweed (*Sargassum muticum*  
316 ((Yendo) Fensholt, 1995), and surfgrass (*Phylospadix spp.*), respectively. Benthic cover is  
317 expected to change less dramatically for taxa occupying primarily upper intertidal habitat, such  
318 as mussels, barnacles, crustose coralline algae, and green algal turf. For example, we expect that  
319 cover of barnacles (*Balanus/Cthamalus spp.*) will decrease by an average of 52.99 % ( $\pm$  12.01;  
320 range 20.38 - 77.84) across our study sites under the IPCC upper-end projection.

321

322



323**Figure 4. Sea-level rise impacts to benthic community cover.** Estimated current and future  
324intertidal area coverage for 10 most common benthic community members at each survey site  
325under 0 – 2.0 m of sea-level rise, showing decreases for all benthic space occupiers.

326

## 327**Invertebrate abundance and density estimates for sea-level rise**

### 328**scenarios**

329We estimate nearly ubiquitous declines in numerical abundance of sessile and mobile  
330invertebrates with sea-level rise (Fig 5). Lower and middle intertidal taxa will exhibit greater  
331population declines than upper intertidal taxa, and the largest declines will be observed in the  
332first 0.5 to 1.0 meter of sea-level rise. For example, our results suggest that the abundance of  
333green solitary anemone (*Anthopleura sola/xanthogrammica*) will decrease by an average of  
33464.37% ( $\pm 8.66$ ) and 76.20% ( $\pm 15.60$ ) across study sites at 0.5 and 1.0 m of sea-level rise,  
335respectively. In contrast, we estimate smaller declines in the abundance of upper intertidal  
336periwinkles (*Littorina spp.*) with 26.22% ( $\pm 14.9$ ) and 51.19% ( $\pm 0.17$ ) and upper intertidal  
337goose barnacles with 29.10% ( $\pm 5.60$ ) and 47.14% ( $\pm 7.54$ ) across study sites at 0.5 and 1.0 m of  
338sea-level rise, respectively. Across all intertidal invertebrate taxa identified and sites, our results  
339suggest overall mean decreases in abundance of 55.82% ( $\pm 4.25$ ) and 66.92% ( $\pm 4.09$ ) under the  
340IPCC and NRC projections, respectively.

341

342**Figure 5. Sea-level rise impacts to rocky intertidal invertebrate abundances.** Estimated  
343current and future abundances for large invertebrates at survey sites under 0 - 2.0 m sea-level  
344rise.

345 Despite expected declines in overall abundance for many species, we expect to see an increase in  
346 density resulting from the relatively large predicted declines in habitat area under most sea-level  
347 rise scenarios (Fig 6). Nearly all species exhibit significant increases in overall density in the first  
348 0.5 m of sea-level rise at one or more sites. For example, our results suggest an average increase  
349 in density of 85.35% ( $\pm 64.57$ ) for lower intertidal chitons and of 177.65% ( $\pm 107.71$ ) for upper  
350 intertidal periwinkles (*Littorina spp.*) across sites under 0.5 m of sea-level rise. Beyond 0.5 m of  
351 sea-level rise the predicted density trends are more variable, though densities generally increase  
352 with continued loss of colonizable habitat. The major exception was seen with the green  
353 anemone (*Anthopleura sola/xanthogrammica*) at CNM 1 and CNM 2, which we predict will  
354 generally decrease in density as a result of the large estimated declines in population size at these  
355 sites.

356

357 **Figure 6. Sea-level rise impacts to rocky intertidal invertebrate densities.** Estimated current  
358 and future invertebrate densities at study sites.

359

## 360 Discussion

361 Our results suggest that sea-level rise will significantly reduce total rocky intertidal habitat area  
362 at our study sites. Changes will neither occur uniformly across time nor space, but rather will be  
363 most pronounced during the first meter of sea-level rise and within the lower and middle  
364 intertidal zones. As seas rise, the broad intertidal bench present at our study locations will  
365 quickly be submerged, resulting in a first-rapid, then more gradual loss of intertidal habitat area.  
366 We also model variable but generally negative impacts to the rocky intertidal communities at our  
367 survey sites, even under modest sea-level rise scenarios well within the range projected for the

368next century. As the amount of available habitat decreases we predict reductions in benthic cover  
369for all major benthic space occupiers. We also predict significant population declines for  
370invertebrate species. Finally, despite declines in overall abundance, we predict that densities of  
371invertebrates will generally increase as habitat area decreases.

372

### 373**Impacts to rocky intertidal community structure**

374Habitat area is a limiting factor affecting growth and abundance of rocky intertidal species [32].  
375Thus, the changes in habitat area estimated here will likely significantly impact community  
376structure. As habitat area is compressed, biotic interactions known to drive community structure  
377will likely change. Both competition and predation will likely intensify as densities of sessile and  
378mobile invertebrates increase. Additionally, interactions that were otherwise rare or non-existent  
379due to the spatial separation between species may become intensified or be created as species are  
380spatially compressed. Further, because rocky intertidal organisms exhibit distinct distributions  
381across tidal elevation and a range of life history strategies, the impact of sea-level rise will likely  
382be non-uniform across the rocky intertidal community both taxonomically and through time. Our  
383results suggest that lower and middle intertidal species will generally experience the greatest  
384losses of benthic cover and abundance. Because these species will also experience extensive  
385habitat loss more quickly than upper intertidal species, it is possible that they will struggle to  
386compete for space as they are forced to move upward. If dominant upper intertidal benthic space  
387occupiers, such as the California Mussel (*Mytilus californianus*), experience little habitat loss  
388under early sea-level rise scenarios and have little competition for space in the largely bare  
389substrate above their current distributions, they may gain a distinct competitive advantage. Long-

390lived species with high habitat affinities and small home ranges, such as owl limpets (*Lottia*  
391*gigantea* (Sowerby, 1834)) and the critically endangered intertidal black abalone (*Haliotis*  
392*cracherodii* (Leach, 1814)) will potentially be more heavily impacted than short-lived species  
393with low habitat affinities, such as many barnacles, even if these species occupy the same tidal  
394zone. These species may experience significant change within their lifespans and are more likely  
395to experience loss of necessary microhabitats as conditions change due to their narrow habitat  
396requirements.

397

### 398**Impacts to rocky intertidal function**

399As sea-level rise changes species interaction networks and competitive hierarchies, the function  
400of the rocky intertidal ecosystem will also potentially shift. Our results suggest that as sea-levels  
401rise, the middle and upper intertidal will occupy a greater proportion of total intertidal area (S1  
402Fig). Lower shore habitats are generally recognized to be richer in terms of species diversity and  
403higher in productivity [49], thus declines in this zone may be of particular consequence. Loss of  
404primary producers common in the lower intertidal may drive a subsequent reduction in  
405herbivores in this region and a reduction in nutrient and biomass export to adjacent areas [50].  
406Additionally, loss of pools common in the lower intertidal as a result of a general steepening of  
407the coastal profile may decrease important nursery habitat for offshore species such as the  
408opaleye (*Girella nigricans*(Ayres, 1860)) [51], and foraging habitat for commercially important  
409species such as the spiny lobster (*Panulirus interruptus* (Randall, 1840)) [52] as well as many  
410seabirds [20]. As seas rise it will be crucial to examine the impacts of such shifts in community  
411structure to ecosystem function to inform management policies.

## 412 **Future directions**

413 Our study provides a framework to evaluate climate change impacts on one the world's most  
414 important marine ecosystems at a scale not previously possible. We found compelling evidence  
415 that sea-level rise will significantly and profoundly affect species inhabiting this habitat. Future  
416 studies can improve upon this approach by incorporating additional information on physical  
417 parameters that are known to influence spatial heterogeneity in rocky intertidal community  
418 organization and that are likely to evolve under global climate change, such as temperature [53],  
419 ocean chemistry [54,55], and wave intensity [45]. Further coverage of much larger areas of  
420 coastline will also allow researchers to more precisely predict the future impacts of climate  
421 change on the rocky intertidal.

422 The rocky intertidal is the most accessible of marine environments, and is of immense  
423 recreational, commercial, and educational value to coastal societies worldwide. These systems  
424 are likely to be substantially modified by large-magnitude global sea-level rise on an accelerated  
425 and uncertain timeline within the next century. The implications of our results are wide reaching,  
426 highlighting the need for ecosystem-scale evaluations in order to quantify and visualize the  
427 global change impacts that will modify the structure and function of this unique ecosystem.  
428 Similar approaches are needed more broadly for global coastlines in order to understand how to  
429 manage and mitigate impending global change impacts [42].

## 430 **Acknowledgements**

431 The authors would like to acknowledge C. Amir, L. Bonito, D. Chargualaf, A. Martinez for their  
432 assistance collecting field data, J. Jones and K. Lombardo for assistance with acquiring permits  
433 and accessing Cabrillo National Monument sites, I. Kaye for providing permits to access the  
434 Scripps Coastal Reserve, J. Jenness for advice on analyzing DEM data in GIS and on the use of  
435 the DEM Surface Analyst extension for ArcGIS, S.A. Sandin for modeling the use of large area  
436 imaging for studying spatial ecology, E. Parnell for his natural history guidance, V. Petrovic for  
437 his assistance with 3D model visualization, and N. Pederson for assistance with image  
438 processing.

## 439References

4401. Nicholls RJ, Cazenave A. Sea-Level Rise and Its Impact on Coastal Zones. *Science* (80- ).  
441 2010;328(5985):1517–20.
4422. Hoegh-Guldberg O, Bruno JF. The Impact of Climate Change on the World’s Marine  
443 Ecosystems. *Science* (80- ). 2010;328(2010):1523–9.
4443. Church JA, Clark PU, Cazenave A, Gregory JM, Jevrejeva S, Levermann A, et al. 2013:  
445 Sea level change. *Clim Chang 2013 Phys Sci Basis Contrib Work Gr I to Fifth Assess Rep*  
446 *Intergov Panel Clim Chang*. 2013;1137–216.
4474. Church JA, White NJ. A 20th century acceleration in global sea-level rise. *Geophys Res*  
448 *Lett*. 2006;33:94–7.
4495. National Research Council. *Sea-Level Rise for the Coasts of California, Oregon, and*  
450 *Washington*: Washington, DC: The National Academies Press; 2012. 1-201 p.
4516. Mcleod E, Poulter B, Hinkel J, Reyes E, Salm R. Sea-level rise impact models and  
452 environmental conservation: A review of models and their applications. *Ocean Coast*  
453 *Manag* . 2010;53(9):507–17. Available from:  
454 <http://dx.doi.org/10.1016/j.ocecoaman.2010.06.009>
4557. Chen X, Zhang X, Church JA, Watson CS, King MA, Monselesan D, et al. The increasing  
456 rate of global mean sea-level rise during 1993 – 2014. *Nat Clim Chang*. 2017;7(July):492–  
457 5.
4588. Cazenave A, Dieng H, Meyssignac B, Schuckmann K Von, Decharme B, Berthier E. The  
459 rate of sea-level rise. *Nat Clim Chang*. 2014;4(May):358–61.

4609. Rahmstorf S. A new view on sea level rise. *Nat Reports Clim Chang*. 2010;4(April):0–1.
46110. Sweet W V., Kopp RE, Weaver CP, Obeysekera J, Horton RM, Thieler ER, et al. Global  
462 and Regional Sea Level Rise Scenarios for the United States. Silver Spring, Maryland,  
463 USA; 2017.
46411. Helmuth B, Mieszkowska N, Moore P, Hawkins SJ. Living on the Edge of Two Changing  
465 Worlds: Forecasting the Responses of Rocky Intertidal Ecosystems to Climate Change.  
466 *Annu Rev Ecol Evol Syst* . 2006;37:373–404. Available from: [http://www.jstor.org/stable/](http://www.jstor.org/stable/30033837)  
467 30033837
46812. Harley CDG, Hughes RA, Hultgren KM, Miner BG, Sorte CJB, Thornber CS, et al. The  
469 impacts of climate change in coastal marine systems. *Ecol Lett*. 2006;9(2):228–41.
47013. Thompson R, Crowe T, Hawkins S. Rocky intertidal communities: Past environmental  
471 changes, present status and predictions for the next 25 years. *Environ Conserv* .  
472 2002;29(2):168–91. Available from: <http://dx.doi.org/10.1017/S0376892902000115>
47314. Denny M, Paine R. Celestial mechanics, sea level changes, and intertidal ecology. *Biol*  
474 *Bull*. 1998;194(18):108–15.
47515. Emery KO, Kuhn GG. Sea cliffs: their processes, profiles, and classification. *Geol Soc*  
476 *Am Bull*. 1982;93(7):644–54.
47716. Doody JP. Coastal squeeze and managed realignment in southeast England, does it tell us  
478 anything about the future? *Ocean Coast Manag* . 2013;79:34–41. Available from:  
479 <http://dx.doi.org/10.1016/j.ocecoaman.2012.05.008>
48017. Pontee N. Defining coastal squeeze: A discussion. *Ocean Coast Manag*. 2013;84:1–4.
48118. Vaselli S, Bertocci I, Maggi E, Benedetti-Cecchi L. Assessing the consequences of sea



- 482 level rise: Effects of changes in the slope of the substratum on sessile assemblages of  
483 rocky seashores. *Mar Ecol Prog Ser.* 2008;368:9–22.
48419. Jackson AC, Mcilvenny J. Coastal squeeze on rocky shores in northern Scotland and some  
485 possible ecological impacts. *J Exp Mar Bio Ecol.* 2011;400(April (1-2)):314–21.
48620. Hollenbeck JP, Olsen MJ, Haig SM. Using terrestrial laser scanning to support ecological  
487 research in the rocky intertidal zone. *J Coast Conserv.* 2014;18(6):701–14.
48821. Thorner J, Kumar L, Smith SDA. Impacts of climate-change-driven sea level rise on  
489 intertidal rocky reef habitats will be variable and site specific. *PLoS One.* 2014;9(1):1–7.
49022. Brooks TM, Mittermeier RA, Mittermeier CG, Da Fonseca GAB, Rylands AB, Konstant  
491 WR, et al. Habitat Loss and Extinction in the Hotspots of Biodiversity. *Conserv Biol.*  
492 2002;16(4):909–23. Available from: <http://dx.doi.org/10.1046/j.1523-1739.2002.00530.x>
49323. Mantyka-Pringle CS, Martin TG, Rhodes JR. Interactions between climate and habitat loss  
494 effects on biodiversity: A systematic review and meta-analysis. *Glob Chang Biol.*  
495 2012;18(4):1239–52.
49624. Connell JH. The influence of interspecific competition and other factors on the  
497 distribution of the barnacle *Chthamalus stellatus*. Vol. 42, *Ecology.* 1961. p. 710–23.
49825. Menge BA. Organization of the New England Rocky Intertidal Community: Role of  
499 Predation, Competition, and Environmental Heterogeneity. *Ecol Monogr.*  
500 1976;46(4):355–93. Available from: <http://www.esajournals.org/doi/abs/10.2307/1942563>
50126. Menge BA. Indirect Effects in Marine Rocky Intertidal Interaction Webs : Patterns and  
502 Importance. *Ecol Monogr.* 1995;65(1):21–74.
50327. Paine RT. A Note on Trophic Complexity and Community Stability. *Am Nat.*

- 504 1969;103(929):91–3. Available from:  
505 <http://www.journals.uchicago.edu/doi/10.1086/282586>
50628. Paine RT. Intertidal Community Structure. Experimental Studies on the Relationship  
507 between a Dominant Competitor and Its Principal Predator. *Oecologia*. 1974;15(2):93–  
508 120.
50929. Paine RT. Food Webs: Linkage, Interaction Strength and Community Infrastructure. *J*  
510 *Anim Ecol*. 1980;49(3):666–85.
51130. Connell JH. Interactions on Marine Rocky Intertidal Shores. *Annu Rev Ecol Syst*.  
512 1972;3(22):169–92.
51331. Paine RT. Food Web Complexity and Species Diversity. *Am Nat* . 1966;100(910):65–75.  
514 Available from: <http://www.jstor.org/stable/2459379>
51532. Dayton PK. Competition , Disturbance , and Community Organization : The Provision and  
516 Subsequent Utilization of Space in a Rocky Intertidal Community. *Ecol Monogr*.  
517 1971;41(4):351–89.
51833. Sousa WP. Disturbance in Marine Intertidal Boulder Fields : The Nonequilibrium  
519 Maintenance of Species Diversity. *Ecology* . 1979;60(6):1225–39. Available from: [http://](http://www.jstor.org/stable/1936969)  
520 [www.jstor.org/stable/1936969](http://www.jstor.org/stable/1936969)
52134. Paine RT. Marine Rocky Shores and Community Ecology: An Experimentalist’s  
522 Perspective. *Excell Ecol*. 1994;175.
52335. Ricketts EF, Calvin J. *Between Pacific Tides*. 1st ed. Hedgpeth JW, editor. Stanford,  
524 California: Stanford University Press; 1939. 487 p.
52536. Guichard F, Bourget E, Agnard JP. High-resolution remote sensing of intertidal

- 526 ecosystems: A low-cost technique to link scale-dependent patterns and processes. *Limnol*  
527 *Oceanogr* . 2000;45(2):328–38. Available from:  
528 <http://doi.wiley.com/10.4319/lo.2000.45.2.0328>
52937. Wedding LM, Christopher LA, Pittman SJ, Friedlander AM, Jorgensen S. Quantifying  
530 seascape structure: Extending terrestrial spatial pattern metrics to the marine realm. *Mar*  
531 *Ecol Prog Ser*. 2011;427(Gustafson 1998):219–32.
53238. Bryson M, Johnson-Roberson M, Murphy RJ, Bongiorno D. Kite Aerial Photography for  
533 Low-Cost, Ultra-high Spatial Resolution Multi-Spectral Mapping of Intertidal  
534 Landscapes. *PLoS One*. 2013;8(9).
53539. Thorner J, Kumar L, Smith SDA. Fine-Scale Three-Dimensional Habitat Mapping as a  
536 Biodiversity Conservation Tool for Intertidal Rocky Reefs. *J Coast Res* .  
537 2013;29(5):1184–90. Available from:  
538 <http://www.bioone.org/doi/abs/10.2112/JCOASTRES-D-12-00142.1>  
539 <http://www.bioone.org/doi/abs/10.2112/JCOASTRES-D-12-00142.1?af=R&>
54040. Burns JHR, Delparte D, Gates RD, Takabayashi M. Integrating structure-from-motion  
541 photogrammetry with geospatial software as a novel technique for quantifying 3D  
542 ecological characteristics of coral reefs. *PeerJ* . 2015;3:e1077. Available from:  
543 <https://doi.org/10.7717/peerj.1077>  
544 <https://www.ncbi.nlm.nih.gov/pmc/articles/PMC4511817/pdf/peerj-03-1077.pdf>
54541. Edwards CB, Eynaud Y, Williams GJ, Pedersen NE, Zgliczynski BJ, Gleason ACR, et al.  
546 Large-area imaging reveals biologically driven non-random spatial patterns of corals at a  
547 remote reef. *Coral Reefs*. 2017;36(4):1–15.

54842. Murfitt SL, Allan BM, Bellgrove A, Rattray A, Young MA, Ierodiaconou D. Applications  
549 of unmanned aerial vehicles in intertidal reef monitoring. *Sci Rep* . 2017;7(1):1–11.  
550 Available from: <http://dx.doi.org/10.1038/s41598-017-10818-9>
55143. Pacific Rocky Intertidal Monitoring: California Central Coast . Available from:  
552 [http://www.eeb.ucsc.edu/pacificrockyintertidal/sites/sites-region/sites-region-ca-](http://www.eeb.ucsc.edu/pacificrockyintertidal/sites/sites-region/sites-region-ca-cen.html#ca-central)  
553 [cen.html#ca-central](http://www.eeb.ucsc.edu/pacificrockyintertidal/sites/sites-region/sites-region-ca-cen.html#ca-central)
55444. California South Coast | MARINe . Multi Agency Rocky Intertidal Network. Available  
555 from: [https://www.eeb.ucsc.edu/pacificrockyintertidal/sites/sites-region/sites-region-ca-](https://www.eeb.ucsc.edu/pacificrockyintertidal/sites/sites-region/sites-region-ca-south.html#ca-south)  
556 [south.html#ca-south](https://www.eeb.ucsc.edu/pacificrockyintertidal/sites/sites-region/sites-region-ca-south.html#ca-south)
55745. Cayan DR, Bromirski PD, Hayhoe K, Tyree M, Dettinger MD, Flick RE. Climate change  
558 projections of sea level extremes along the California coast. *Clim Change* . 2008;87:57–  
559 73. Available from: <http://link.springer.com/10.1007/s10584-007-9376-7>
56046. NOAA Digital Coast: Data Access Viewer . Available from:  
561 <https://coast.noaa.gov/dataviewer/>
56247. Jenness JS. Calculating landscape surface area from digital elevation models. *Wildl Soc*  
563 *Bull.* 2004;32(1986):829–39.
56448. Naughton P, Edwards C, Petrovic V, Kastner R, Kuester F, Sandin S. Scaling the  
565 Annotation of Subtidal Marine Habitats. *WUWnet.* 2015;
56649. Menge BA, Branch GM. Rocky intertidal communities. In: Bertness MD, Gaines SD, Hay  
567 ME, editors. *Marine community ecology.* Sunderland, England: Sinauer Associates; 2001.  
568 p. 221–51.
56950. Liebowitz DM, Nielsen KJ, Dugan JE, Morgan SG, Malone DP, Largier JL, et al.

- 570 Ecosystem connectivity and trophic subsidies of sandy beaches. *Ecosphere*. 2016;7(10):1–  
571 19.
57251. Norris KS. The Functions of Temperature in the Ecology of the Percoid Fish *Girella*  
573 *nigricans* ( Ayres ). *Ecol Monogr*. 1963;33(1):23–62.
57452. Windell SC. Spiny Lobster ( *Panulirus interruptus* ) Use of the Intertidal Zone at a Santa  
575 Catalina Island MPA in Southern California. California State University, Monterey Bay;  
576 2015.
57753. Helmuth B, Harley CDG, Halpin PM, O'Donnell M, Hofmann GE, Blanchette CA.  
578 Climate change and latitudinal patterns of Intertidal thermal stress *Climate Change and*  
579 *Latitudinal Patterns of Intertidal Thermal Stress*. *Science* (80- ). 2002;298:1015–8.
58054. Kroeker KJ, Micheli F, Gambi MC. Ocean acidification causes ecosystem shifts via  
581 altered competitive interactions. *Nat Clim Chang* . 2013;3(2):156–9. Available from:  
582 <http://dx.doi.org/10.1038/nclimate1680>
58355. Kroeker KJ, Sanford E, Rose JM, Blanchette CA, Chan F, Chavez FP, et al. Interacting  
584 environmental mosaics drive geographic variation in mussel performance and predation  
585 vulnerability. *Ecol Lett*. 2016;771–9.
- 586
- 587
- 588
- 589

## 590 **Supporting information captions**

591 **S1 Table. Site Tidal datums from NOAA tidal stations.** Tidal datums were used to segment  
592 the intertidal into zones (upper, middle, lower). Data presented in m in reference to MLLW.

593

594 **S2 Table. Species Identification Metadata.** Table shows species and functional group level  
595 identifications used for stratified random point counts and invertebrate counts.

596

597 **S1 Figure.** Proportion of intertidal area contributed by each tidal zone under 0 – 2.0 m of sea-  
598 level rise for four survey sites.

599

600 **S1 Dataset. Intertidal area estimate data.** Estimates of intertidal area and percent change in  
601 intertidal area (site- and zone-level) for sea-level rise scenarios from LiDAR raster DEM.

602

603 **S2 Dataset. Species benthic cover estimate data.** Site-level estimates of benthic area cover and  
604 percent change in benthic area cover of benthic community members for sea-level rise scenarios.

605

606 **S3 Dataset. Abundance estimate data.** Site-level estimates of abundance of invertebrate taxa  
607 for sea-level rise scenarios.

608

609 **S4 Dataset. Density estimate data.** Site-level estimates of density of invertebrate taxa for sea-  
610 level rise scenarios.

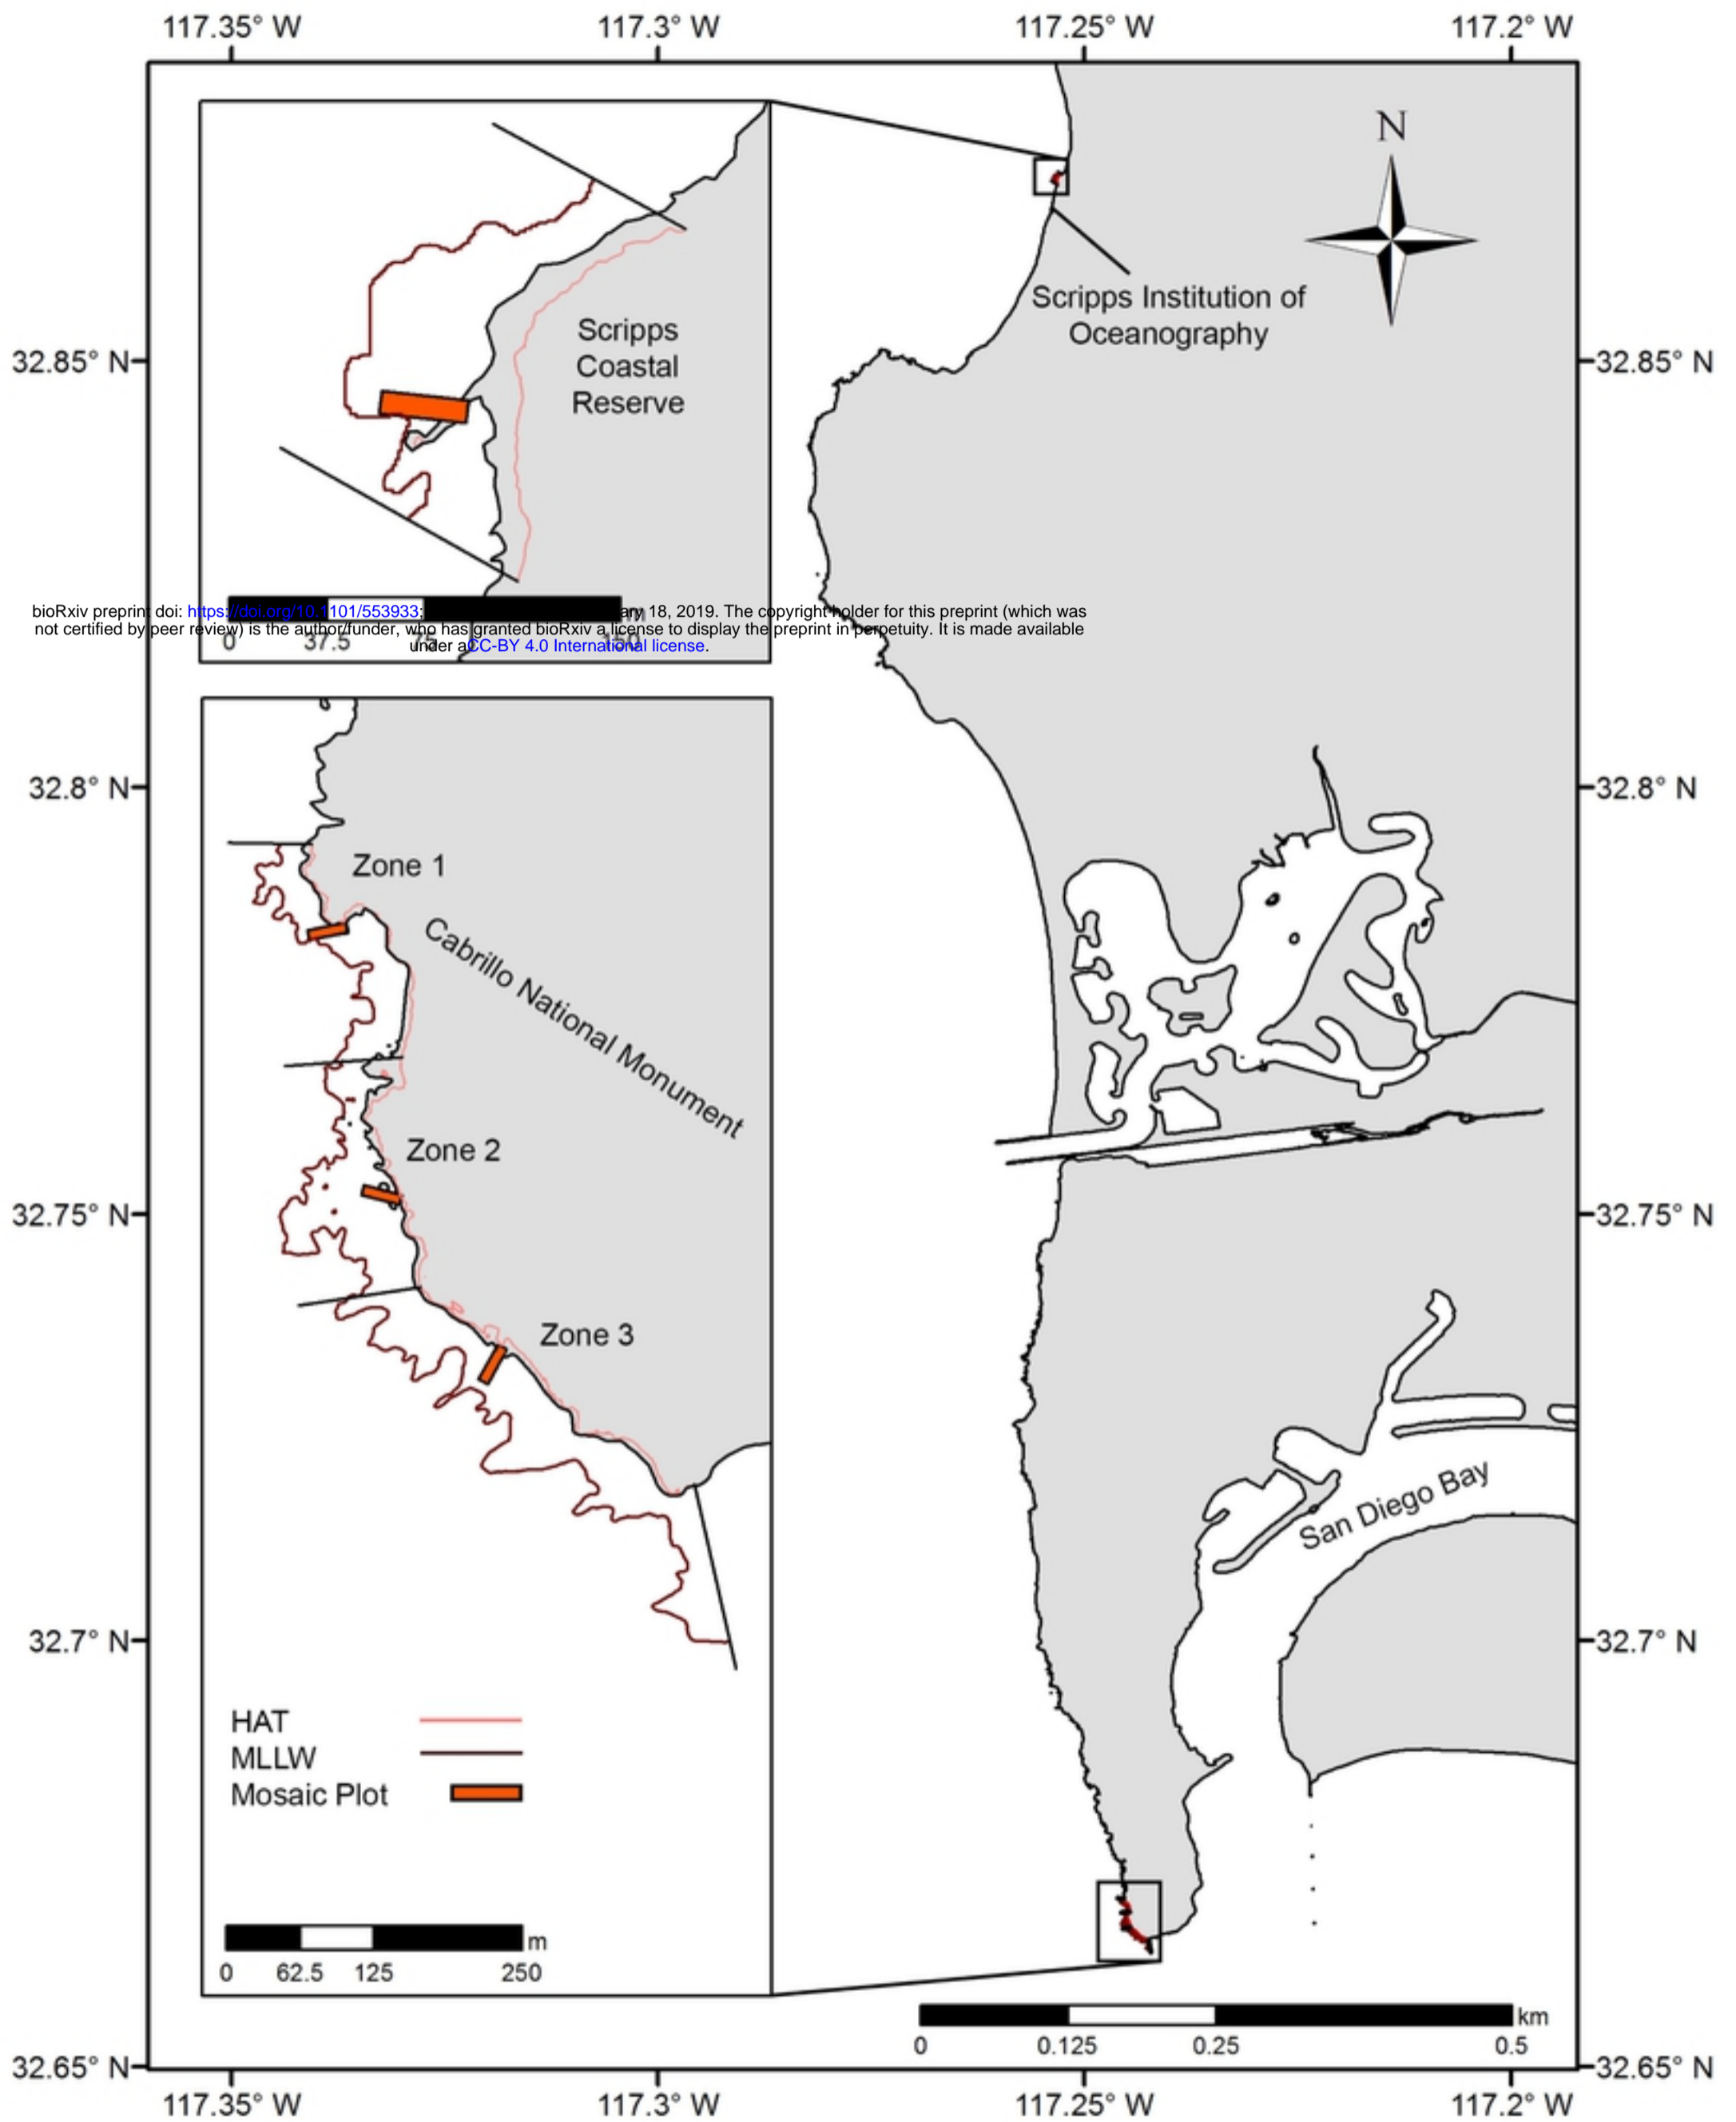

Fig 1

bioRxiv preprint doi: <https://doi.org/10.1101/553933>; this version posted February 18, 2019. The copyright holder for this preprint (which was not certified by peer review) is the author/funder, who has granted bioRxiv a license to display the preprint in perpetuity. It is made available under aCC-BY 4.0 International license.

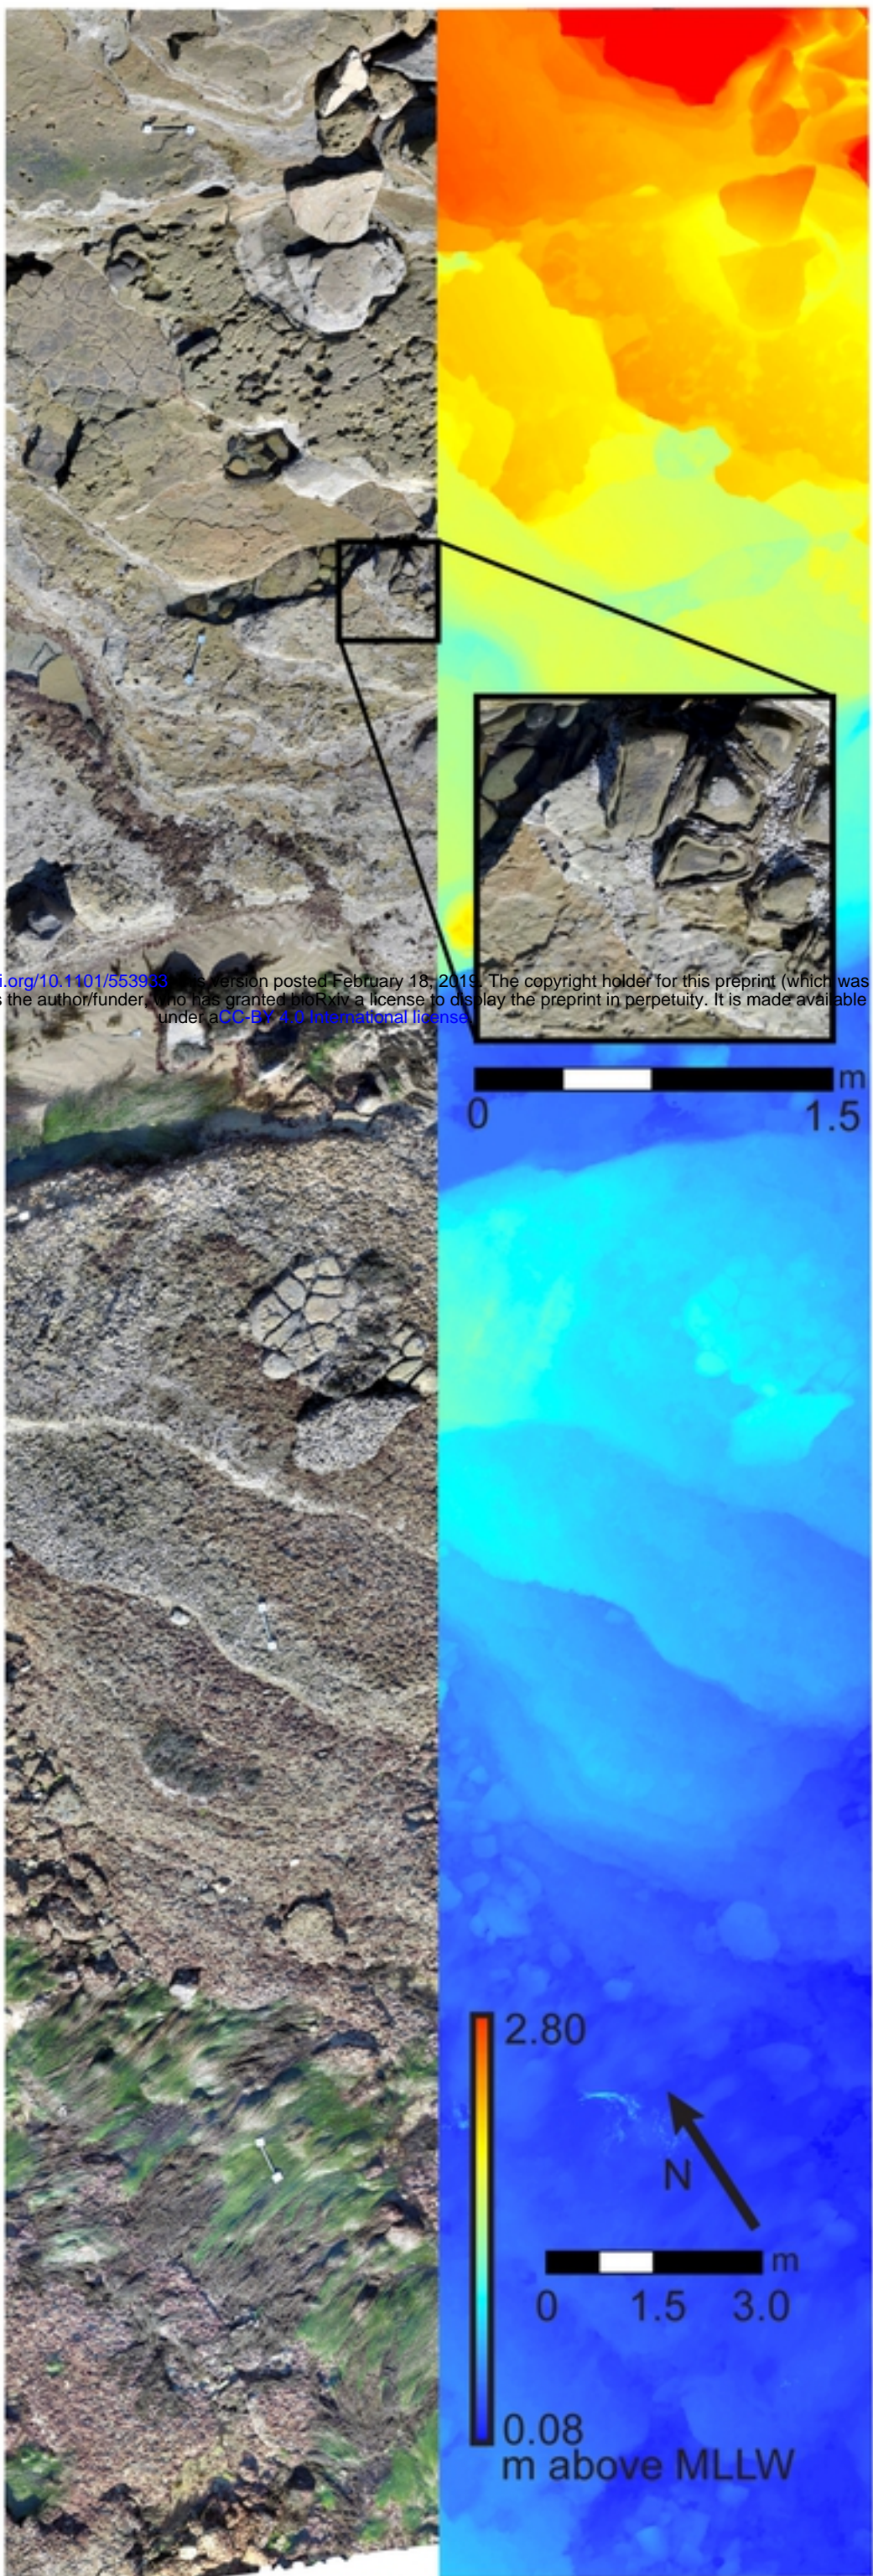

Fig 2



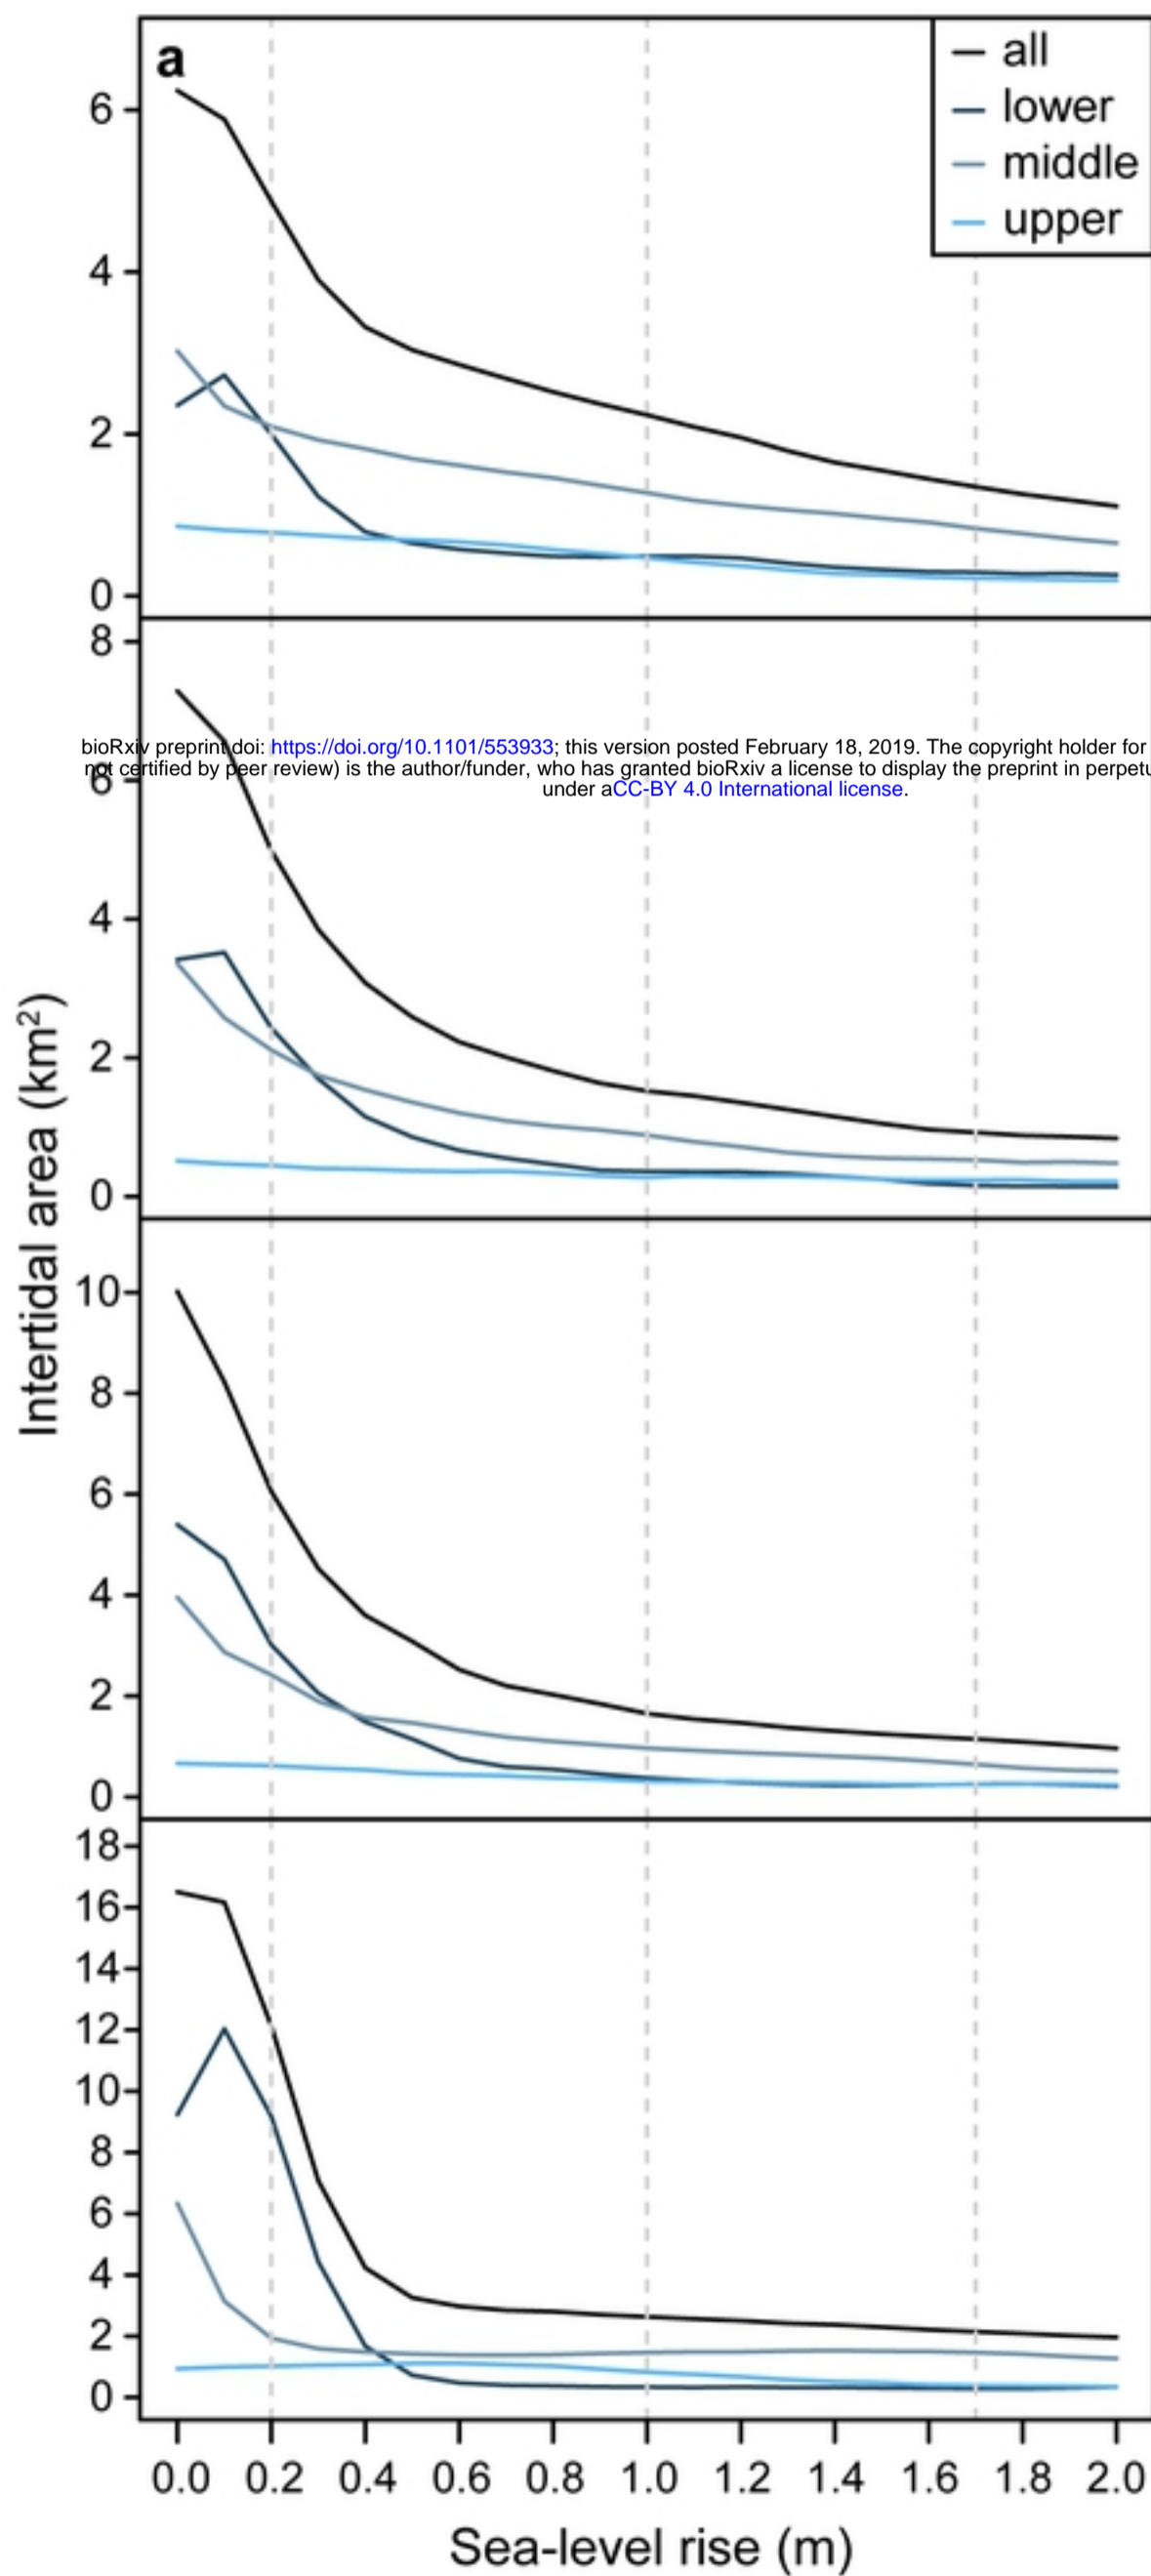

|       |        | % change in intertidal area |                |            |
|-------|--------|-----------------------------|----------------|------------|
|       |        | Zone                        | Observed trend | IPCC upper |
| SCR 0 | all    | -21.89                      | -64.17         | -78.39     |
|       | lower  | -15.17                      | -79.17         | -87.52     |
|       | middle | -30.81                      | -57.87         | -72.41     |
|       | upper  | -8.96                       | -45.31         | -74.40     |
| CNM 1 | all    | -31.57                      | -79.13         | -87.33     |
|       | lower  | -28.95                      | -89.44         | -95.40     |
|       | middle | -37.10                      | -73.65         | -84.31     |
| CNM 2 | all    | -39.55                      | -83.50         | -88.54     |
|       | lower  | -44.13                      | -93.03         | -95.28     |
|       | middle | -38.83                      | -75.55         | -83.66     |
| CNM 3 | all    | -26.51                      | -84.06         | -87.00     |
|       | lower  | -0.65                       | -96.32         | -96.86     |
|       | middle | -69.48                      | -76.85         | -76.84     |
|       | upper  | 9.07                        | -11.85         | -58.46     |

Fig 3

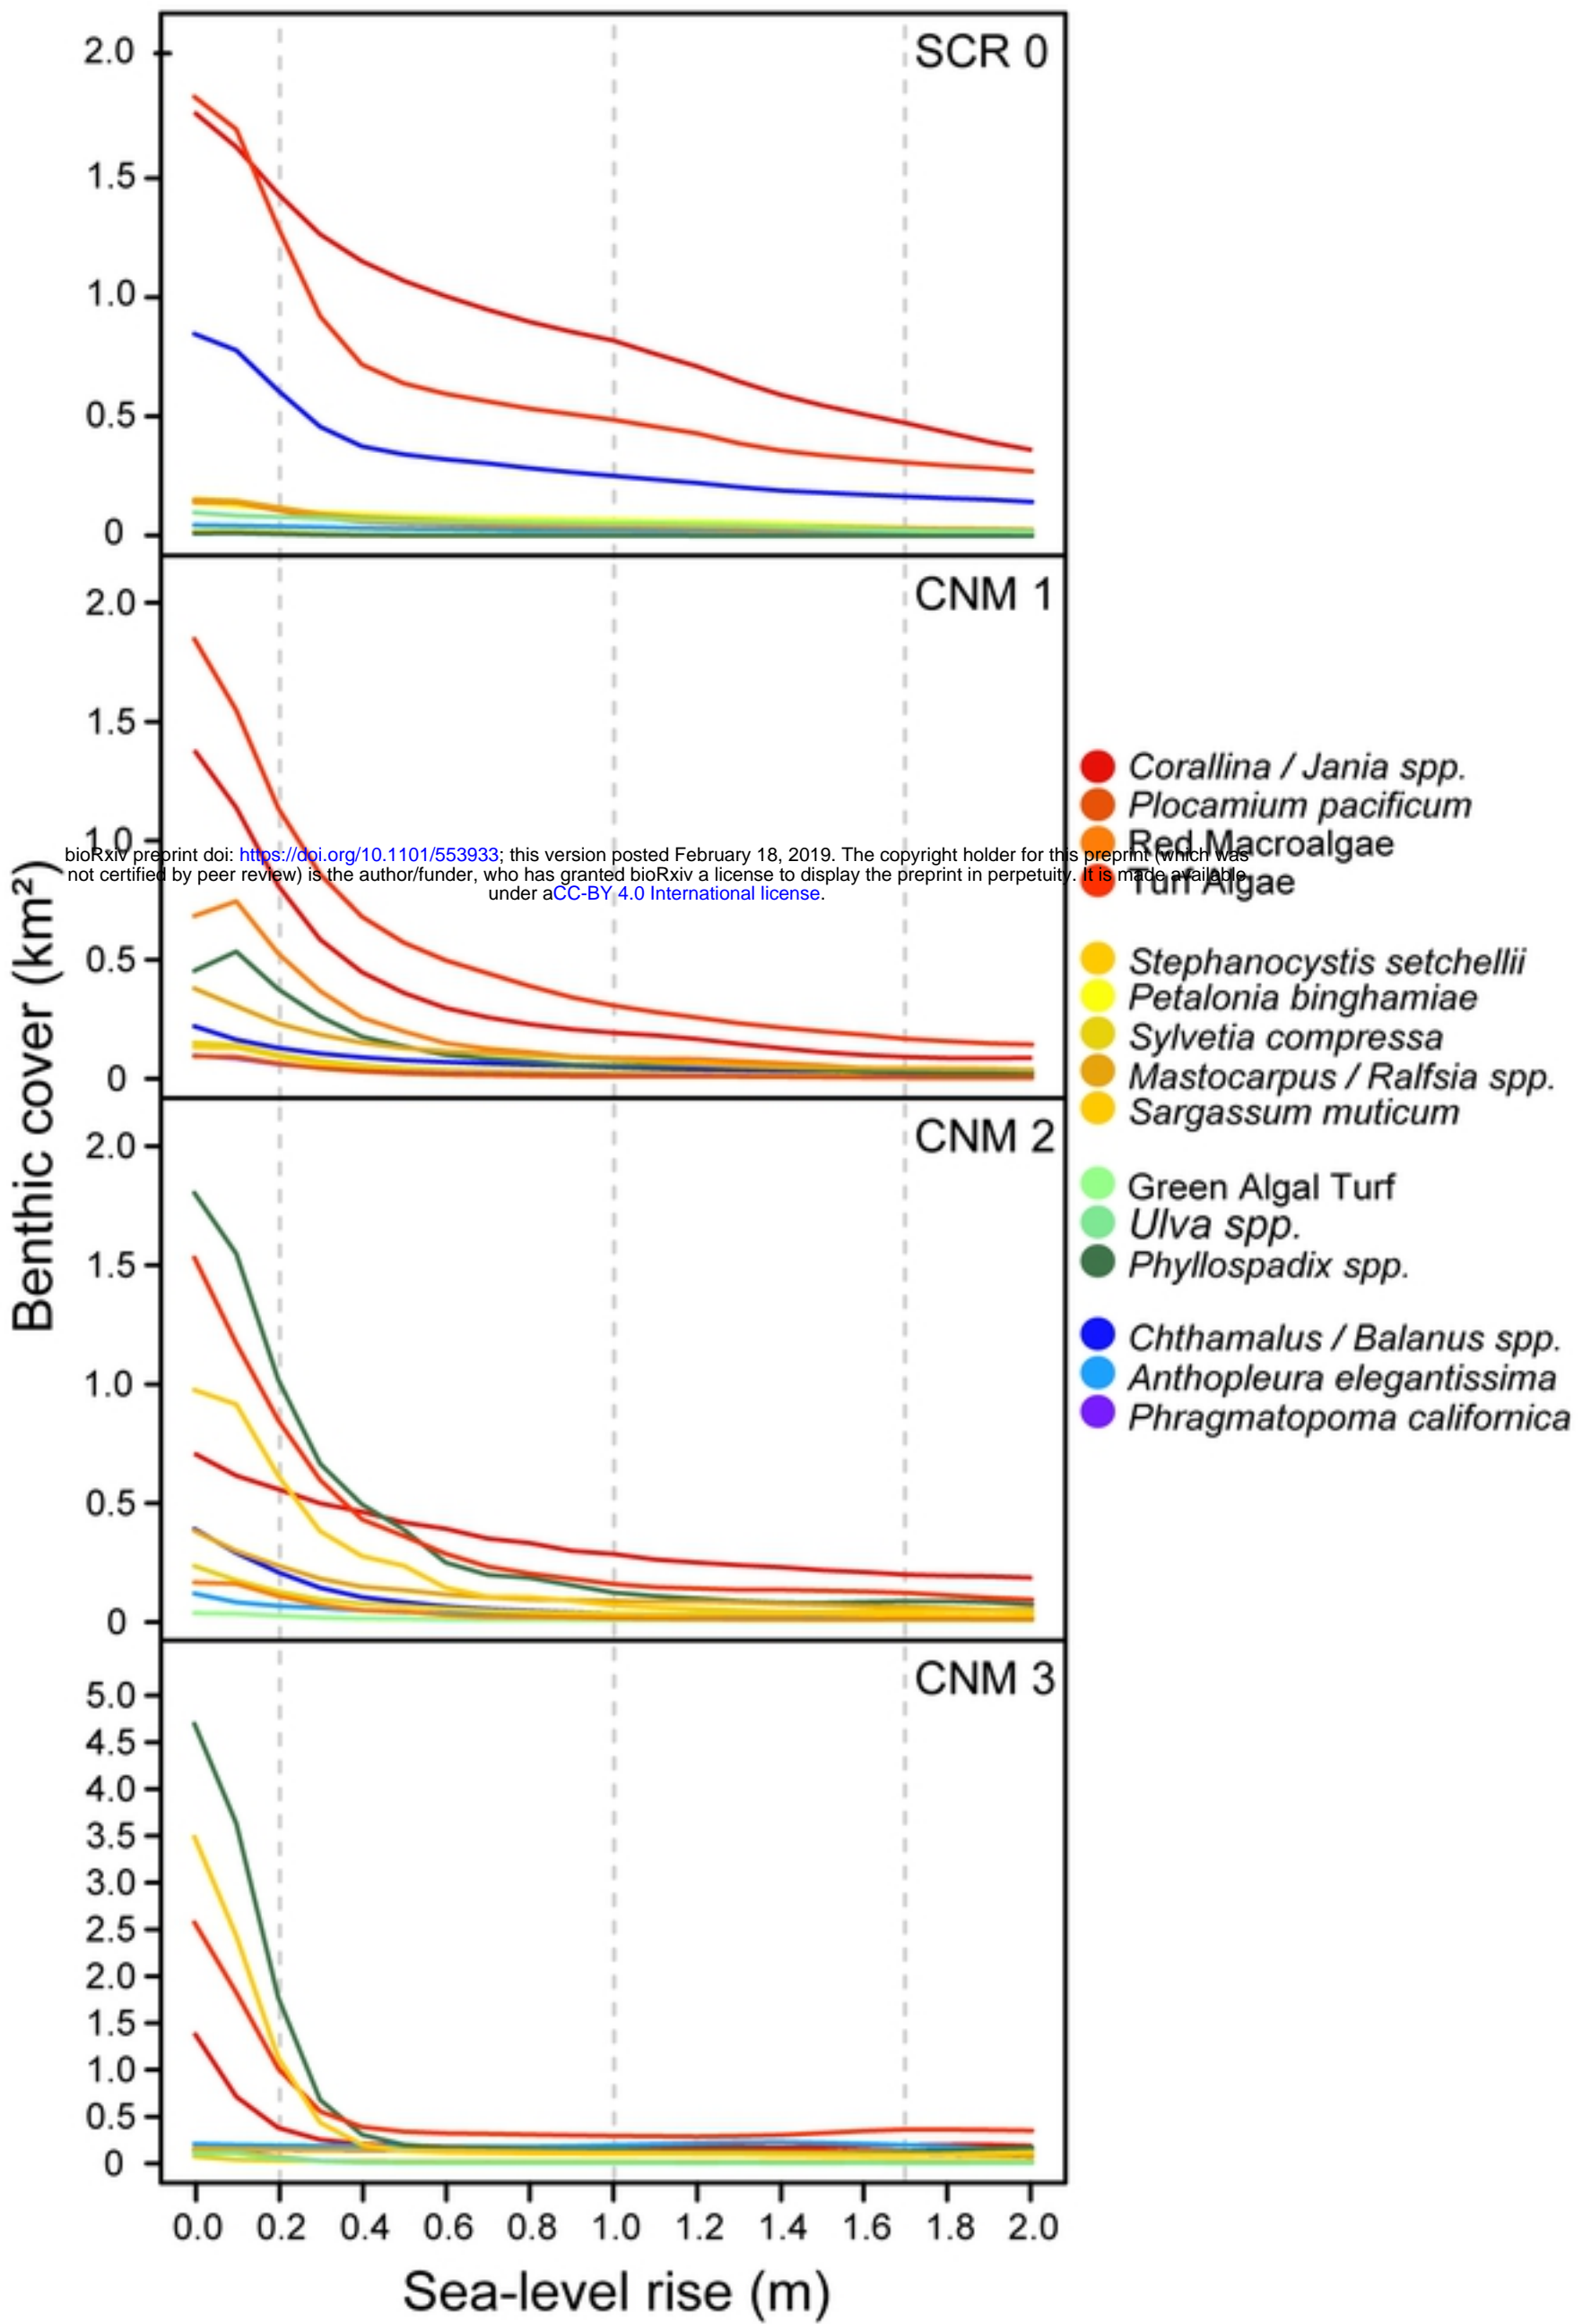

Fig 4

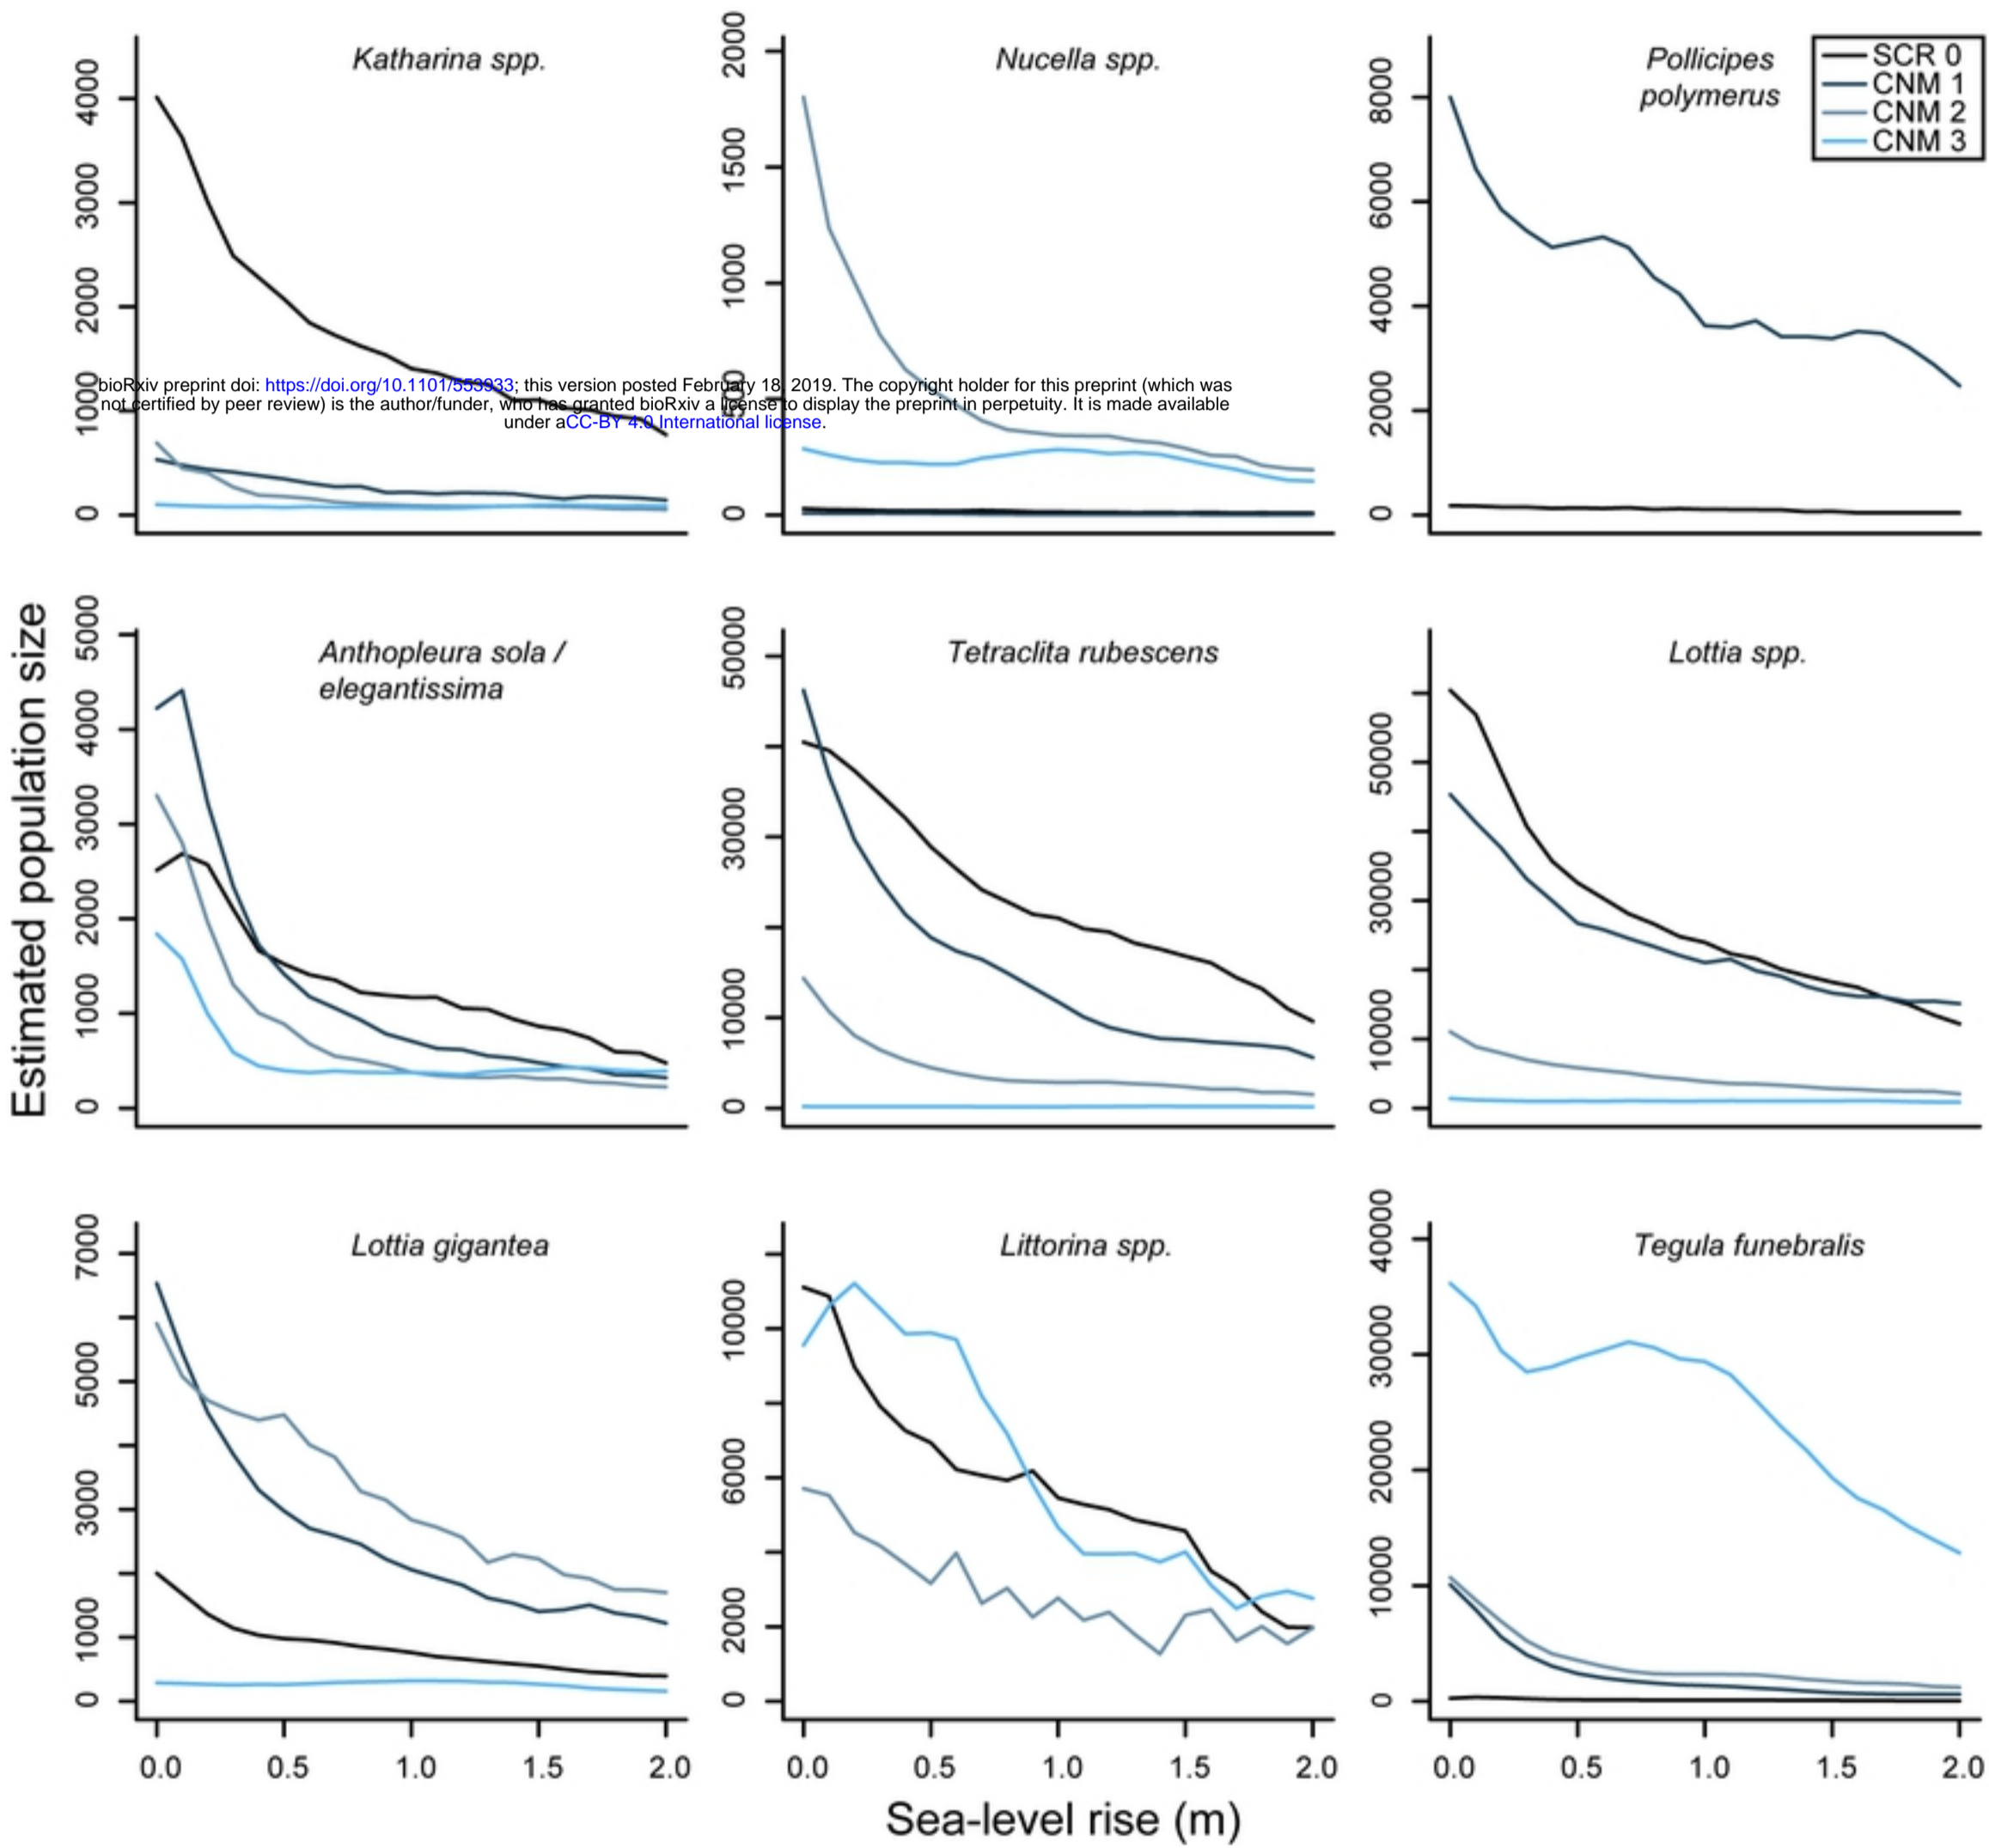

Fig 5

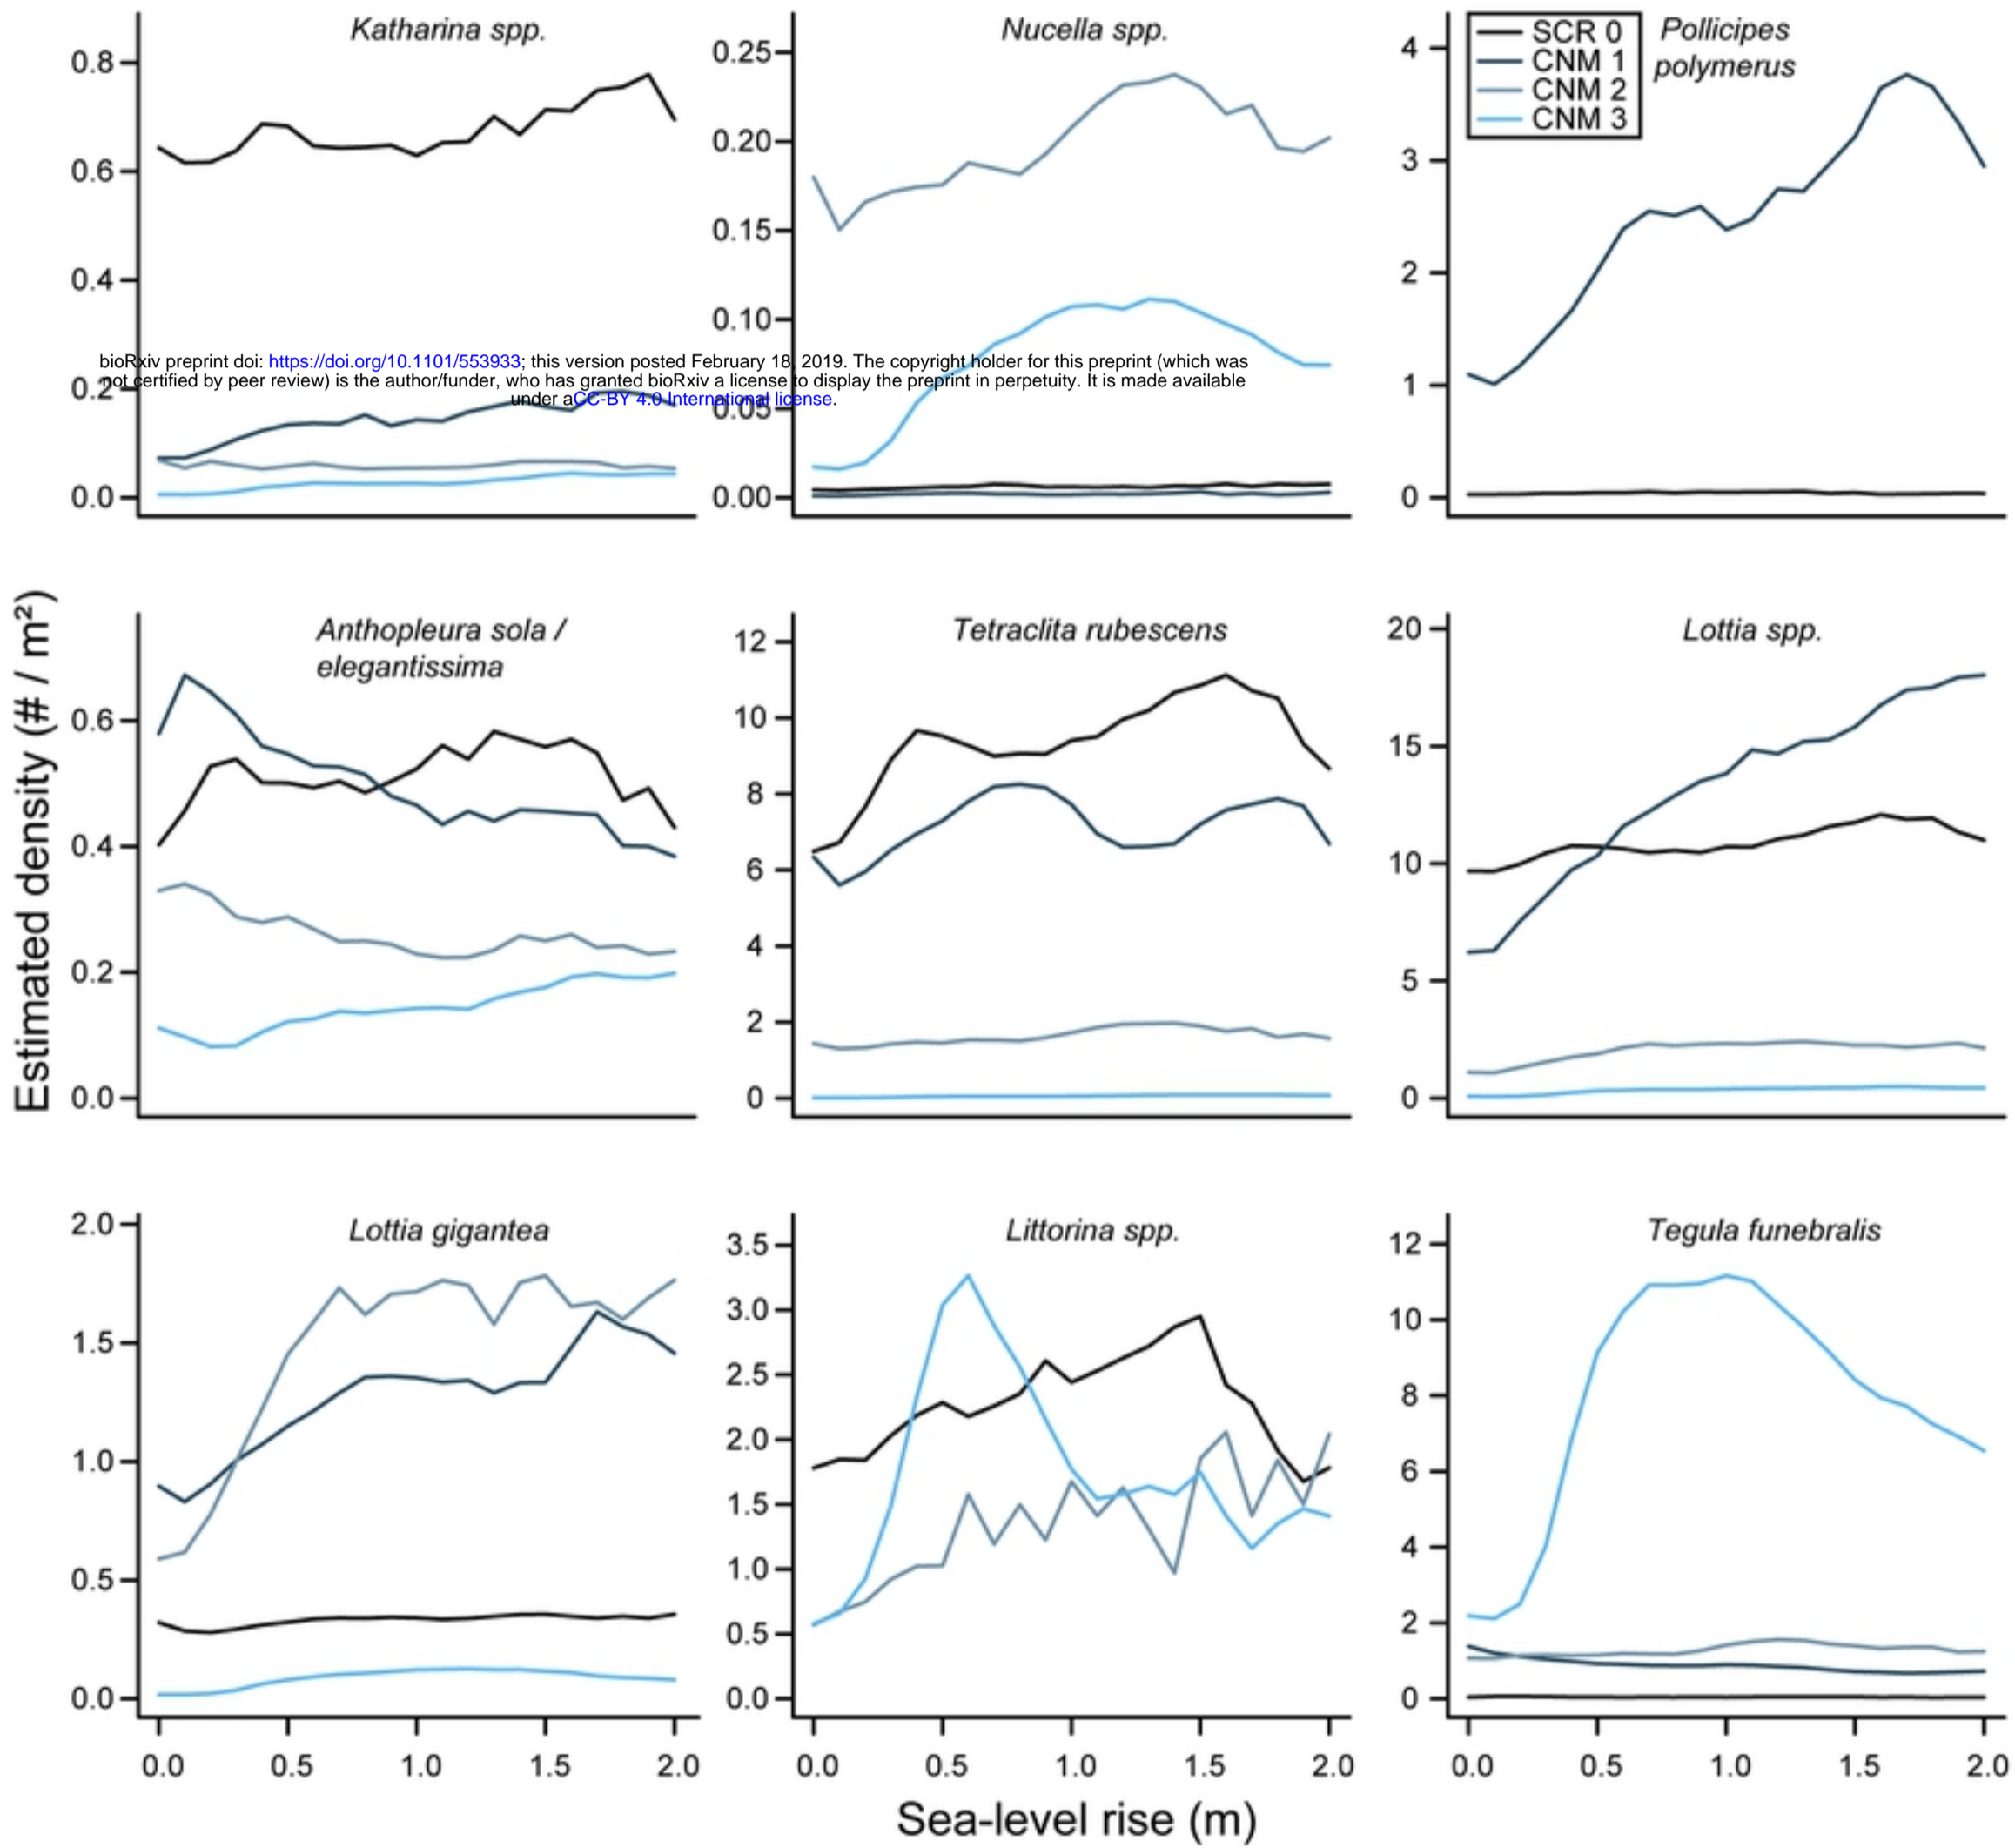

Fig 6
